# Supplementary material
Source: Research Square preprint supplement (doi:10.21203/rs.3.rs-9012917/v1)
Supplement: Supplementary file 1 [file 64e18dc713812739cfaa5846.pdf]

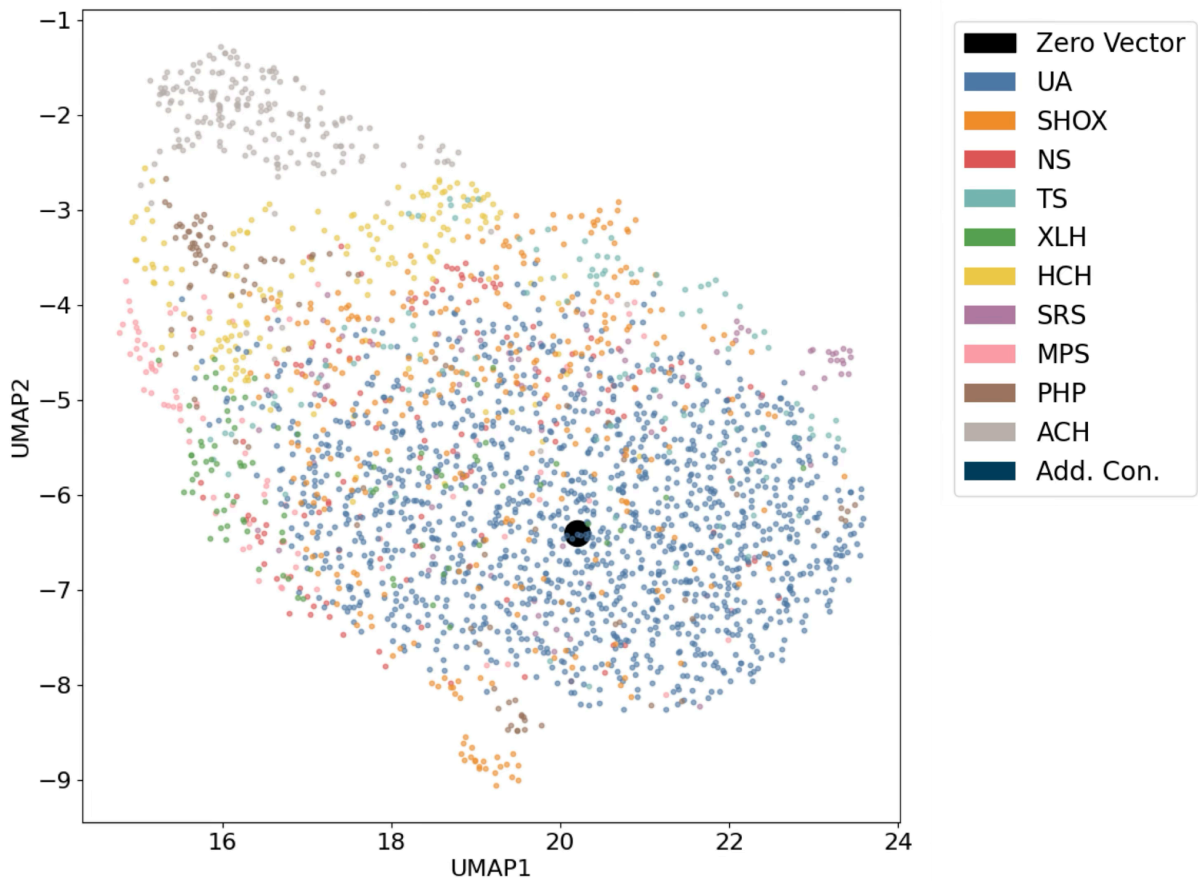

**Supplementary Figure 1: UMAP projection of the *HSPS*.**

All data of the UA cohort and nine affected cohorts in the *HSPS* (high-dimensional standardized phenotypic space) reduced onto two dimensions. Colors indicate cohorts: UA (blue), SHOX deficiency (orange), NS (teal), TS (yellow), XLH (green), SRS (red), HCH (purple), MPS (pink), PHP (brown), and ACH (grey). Training and test samples are shown together in the *HSPS*. The big black dot marks the position of the 550-dimensional zero vector (i.e., the UA reference center).

ROC Curves of All OVO & OVR SVMs (Train=Blue, Test=Red)

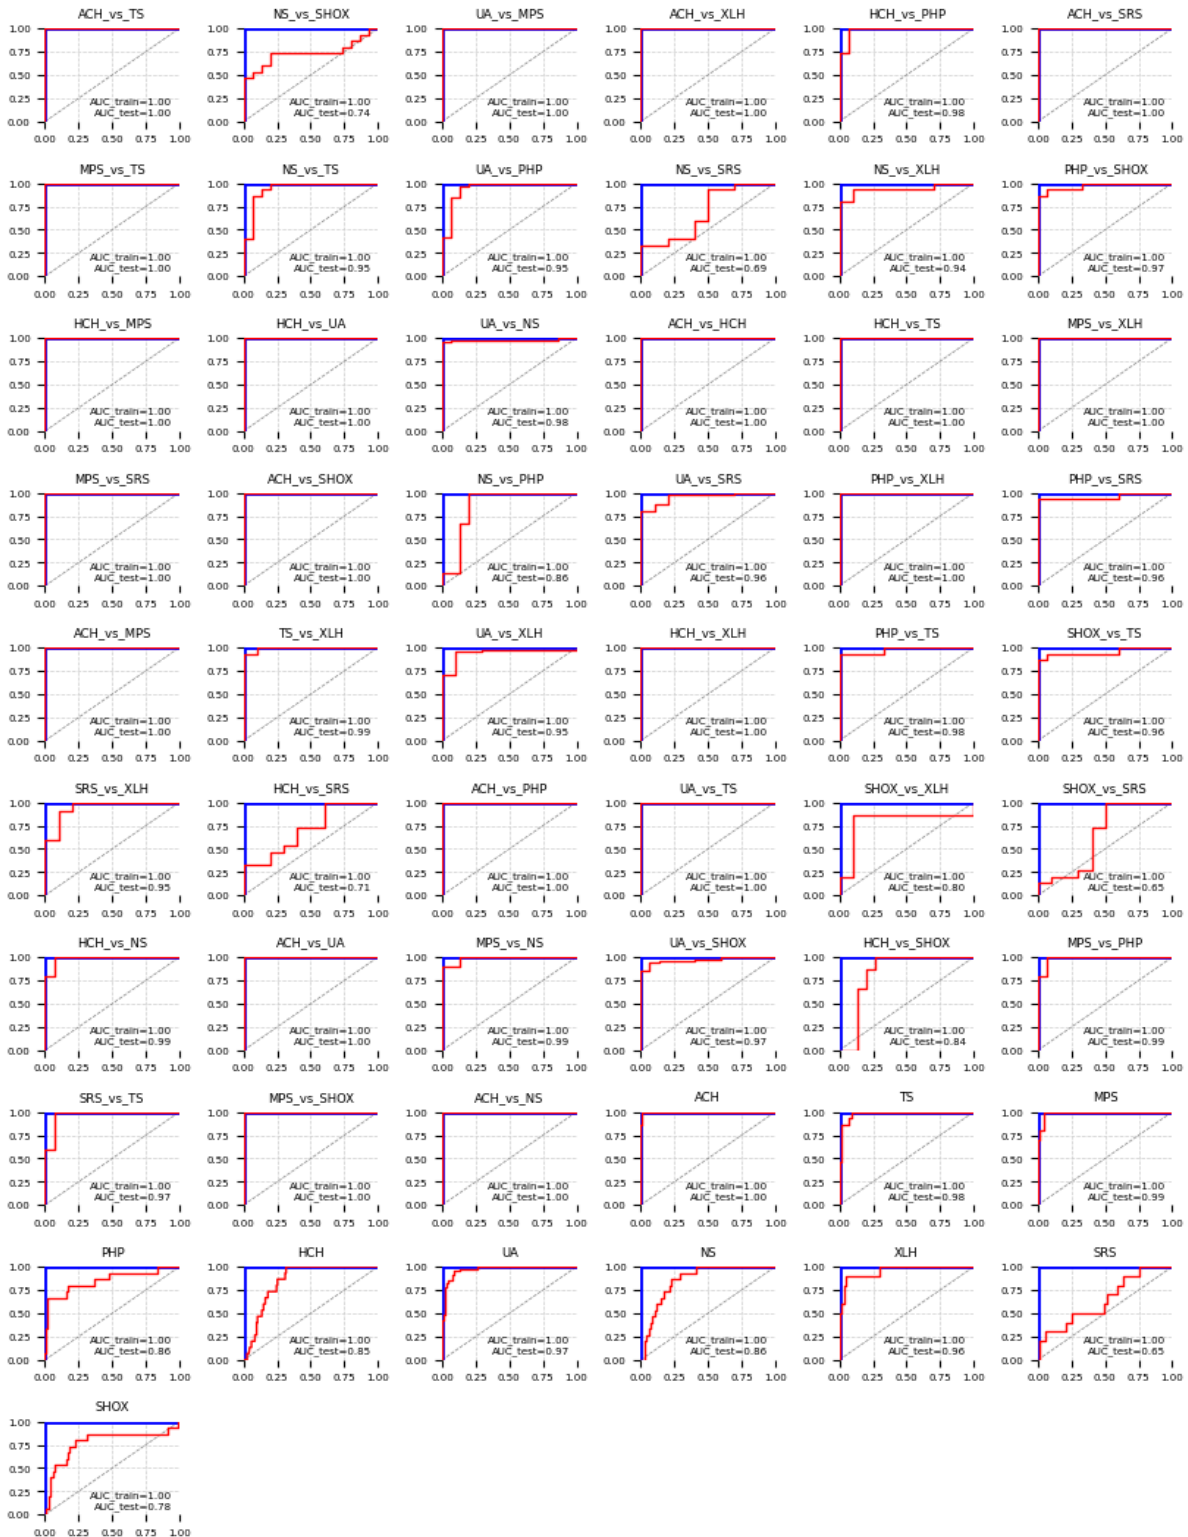

**Supplementary Figure 2: ROC AUC plots of all SVMs**

The Performance of 45 One vs One SVMs (e.g. ACH vs TS) and 10 One vs Rest SVMs (e.g. ACH = ACH vs Rest) are shown with red line indicating the test sets, blue line the training sets on which the SVMs were trained on. Due to overfitting, all ROC–AUC values on the training set reached a perfect score of 1.0.

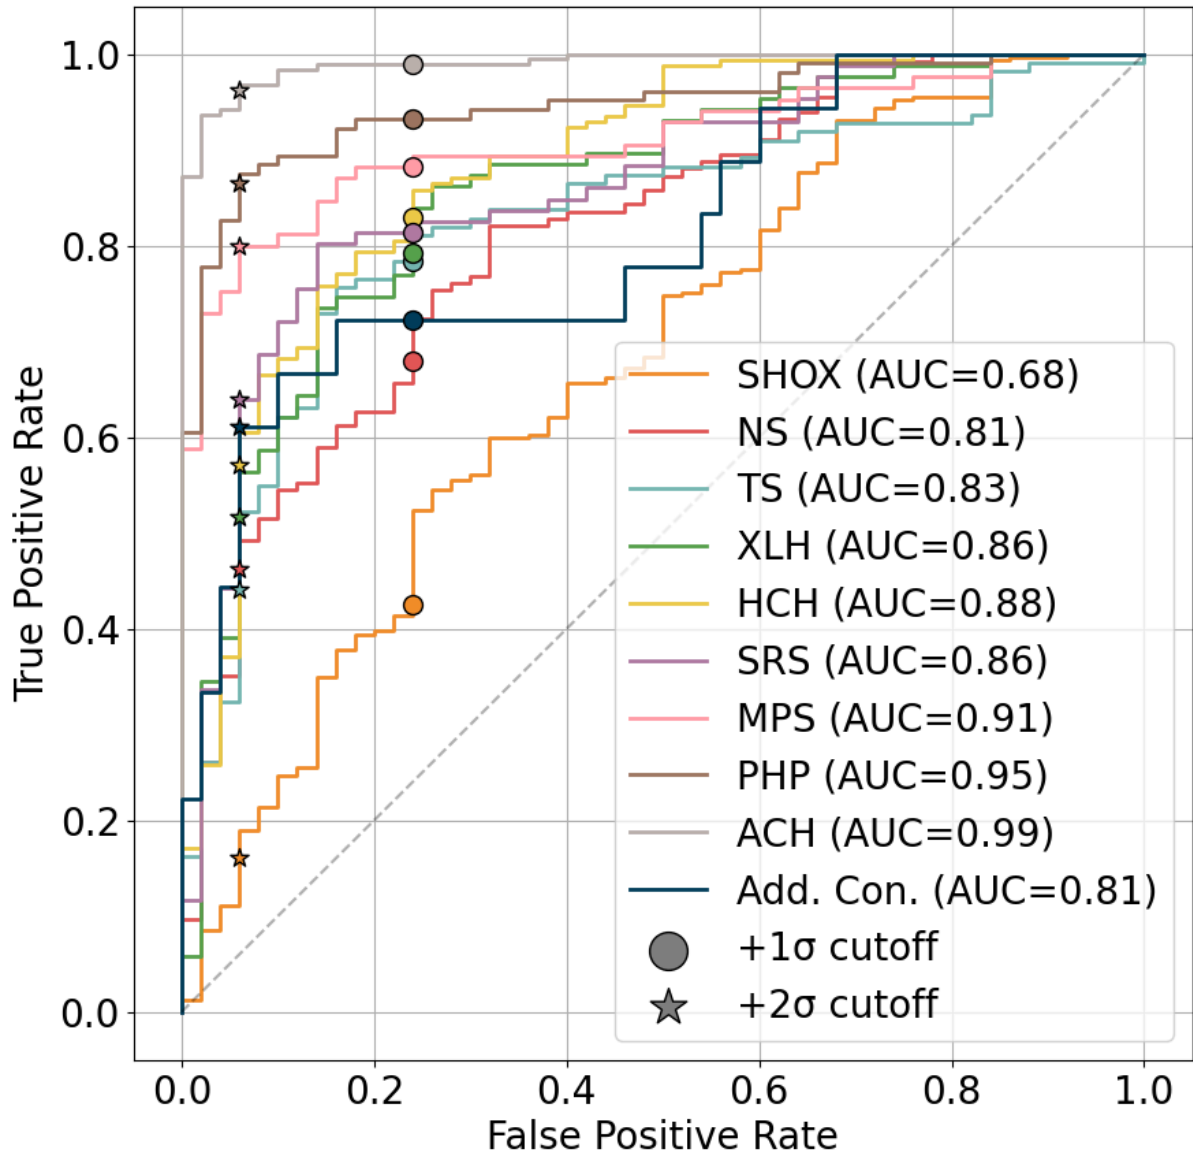

**Supplementary Figure 3 Predictive Power of L1-Norm of  $HSPS$**

ROC-AUC performance of the L1-Norm ( $= ||x_{HSPS}_1||$ ) of the  $HSPS$  for classification of all radiographs (test set and train set) of all nine affected cohorts (and additional conditions) versus the UA cohort test set. Circles and stars indicate threshold of mean L1 Norm of the UA ( $=433.3$ ) reference  $+1\sigma$  ( $=72.6$ ) or  $+2\sigma$  ( $=145.2$ ) respectively.

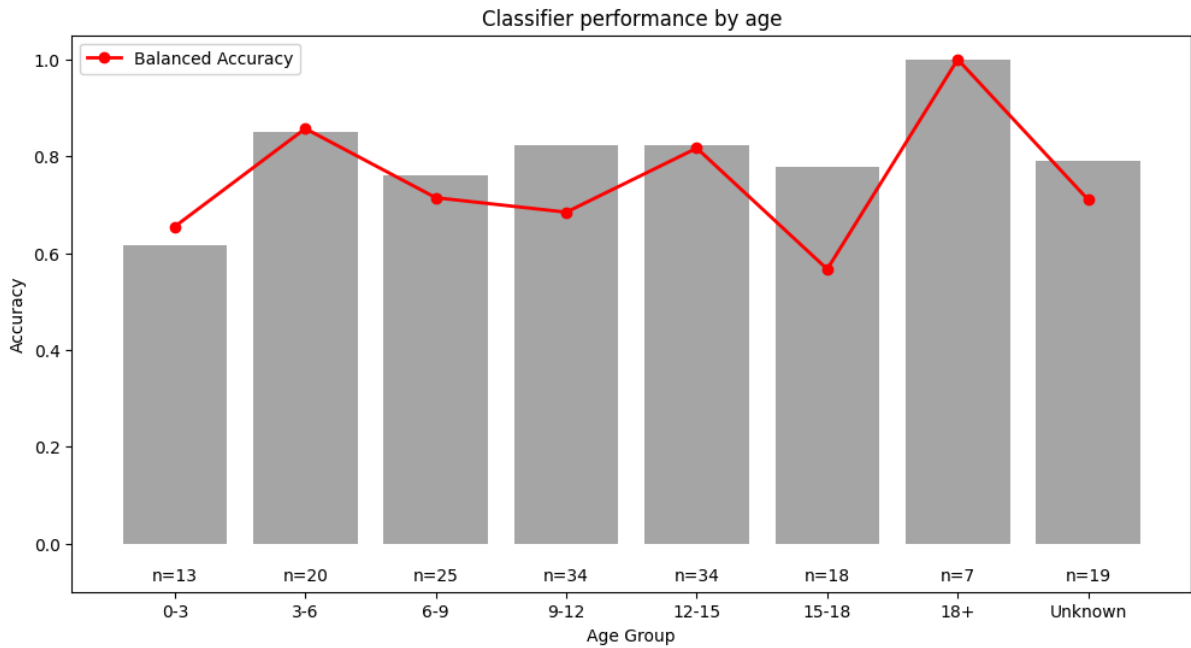

**Supplementary Figure 4.** Performance of the 10-class meta-classifier across age groups. The x-axis shows age groups in 3-year intervals, while the red line indicates the balanced accuracy of the meta-classifier on the test set. Performance remains stable across age groups, indicating consistent classification accuracy throughout childhood and adolescence. Balanced accuracy accounts for the unequal representation of the ten cohorts by weighting individual cohort performances equally. Gray bars indicate the number of radiographs per age group.

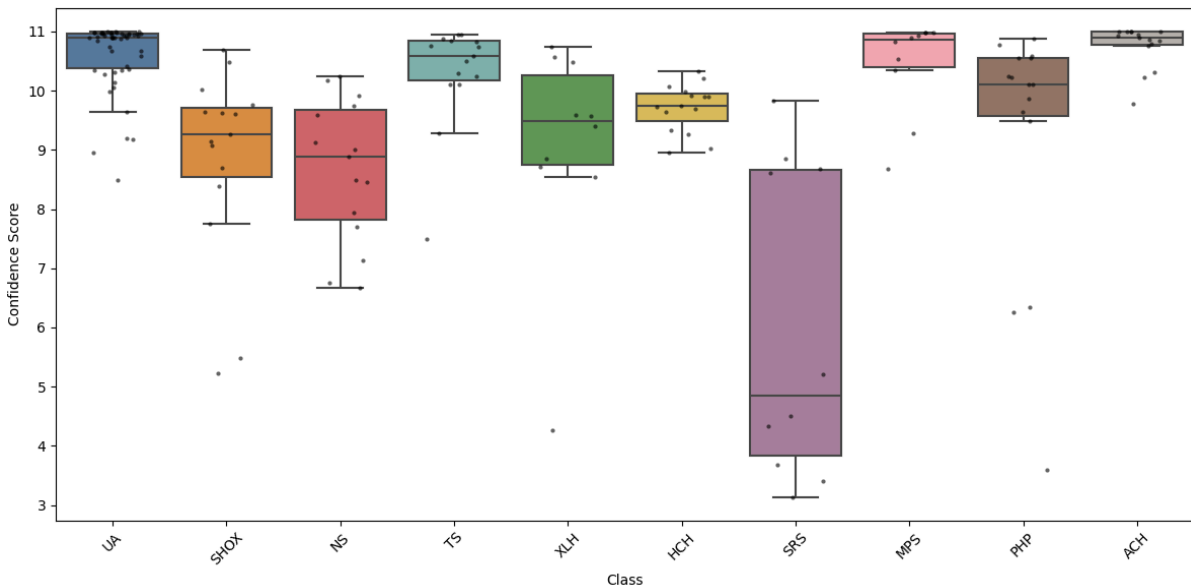

**Supplementary Figure 5** Confidence score boxplot of the 10 cohorts test sets on the 10 class soft majority meta-classifier of their true class. (of Cohort A only class A scores are shown). The maximum confidence scores that can be achieved is  $1 + 9 * (1 + 1/9) = 11$ . The mean confidence is  $55/10 = 5.5$ . Note the difference in scattering between the different classes (ACH, HCH and UA vs SRS)

### UMAP projection of feature space with disease-specific highlighted features

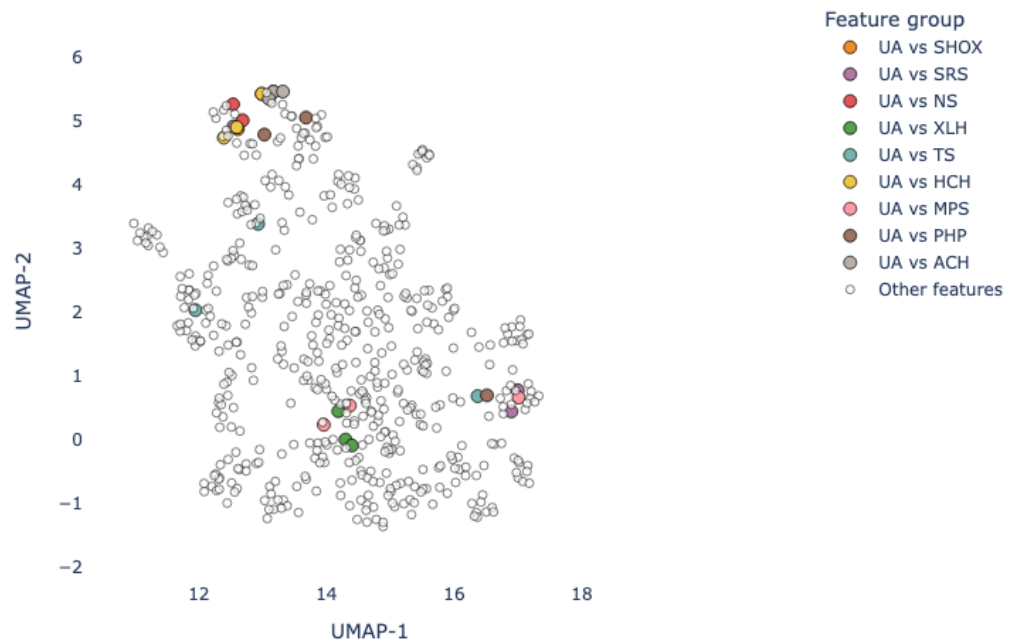

**Supplementary Figure 6.** UMAP projection of the 550-dimensional interpretable morphometric feature space. Each point represents a single morphometric feature embedded into two dimensions using UMAP (Manhattan distance). White points with black outlines indicate features not selected as most discriminative for any specific condition (“other features”). Colored points highlight the top discriminative features for individual disease cohorts (UA vs. SHOX, SRS, NS, XLH, TS, HCH, MPS, PHP, and ACH), as identified in the corresponding one-vs-UA SVM models. The clustering illustrates that disease-specific features occupy distinct regions within the global feature space. UMAP visualization showed that discriminative features for achondroplasia and hypochondroplasia cluster closely together, while features associated with XLH and MPS partially overlap, whereas TS displayed a more widely distributed feature pattern (Figure 6). An interactive version is available here: <https://bone2gene.github.io/Morphometric-Bone2Gene/>

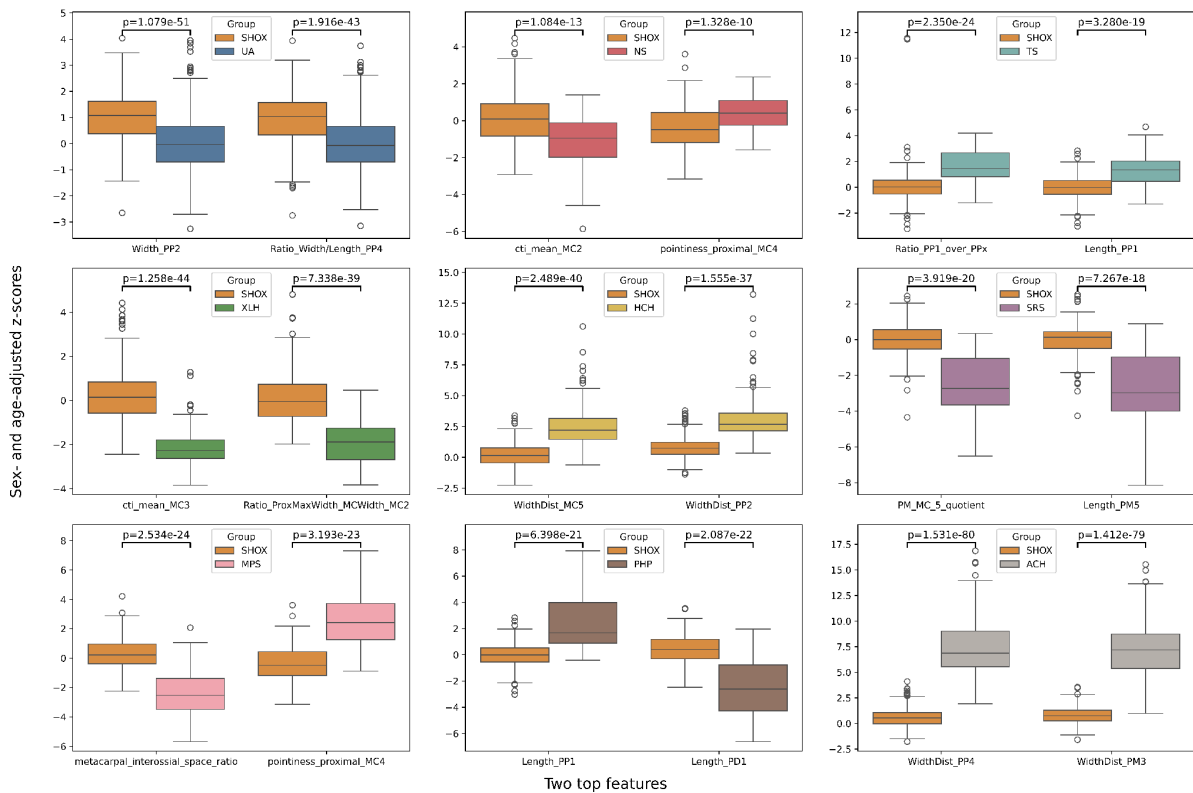

**Supplementary Figure 7 Boxplots of the top-ranked features in the nine “SHOX vs One” scenarios.** Each y-axis shows the sex- and age-adjusted z-score relative to the UA reference set. The nine scenarios compare SHOX images to each condition (UA, NS, TS, XLH, SRS, HCH, MPS, PHP, and ACH). Feature ranking was derived by summing the ROC-based rank and the t-test-based rank. Box colors indicate diagnostic groups: UA (blue), SHOX (orange), NS (teal), TS (yellow), XLH (green), SRS (red), HCH (purple), MPS (pink), PHP (brown), and ACH (grey). Benjamini-Hochberg-adjusted p-values for each pairwise comparison are shown in brackets above the box pairs.

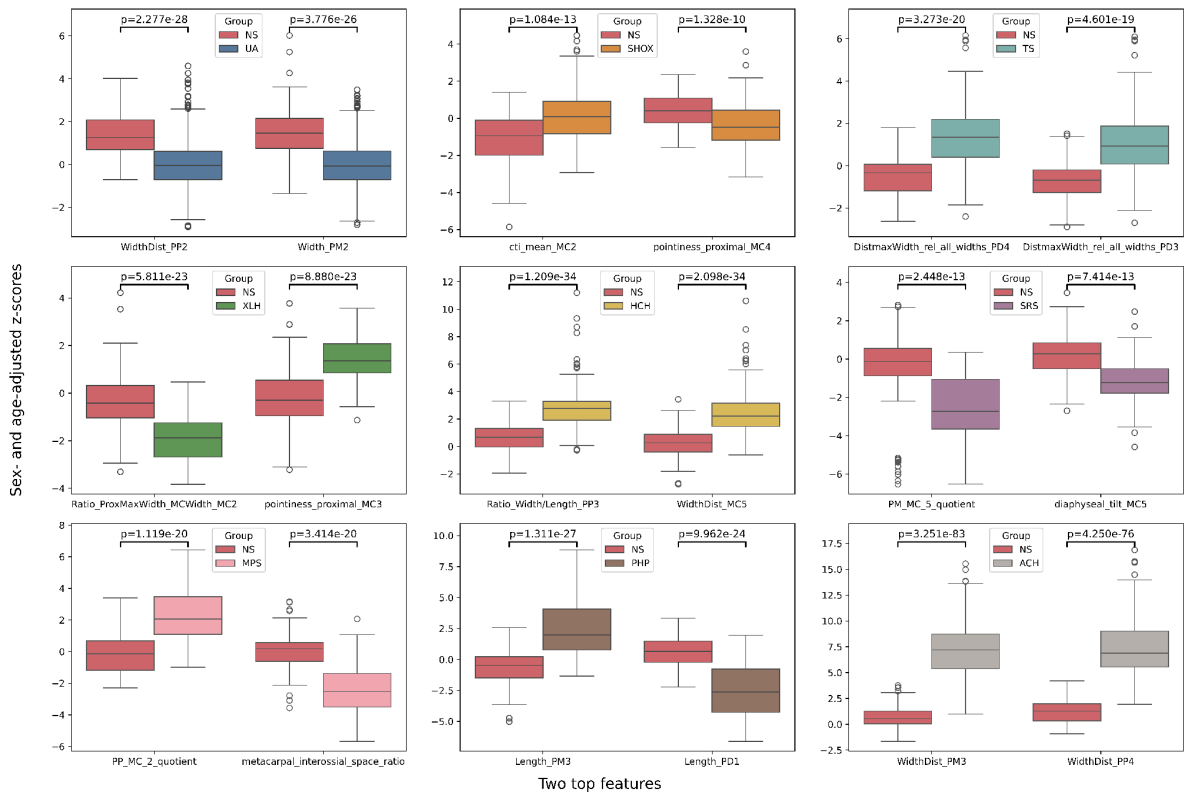

**Supplementary Figure 8 Boxplots of the top-ranked features in the nine “NS vs One” scenarios.** Each y-axis shows the sex- and age-adjusted z-score relative to the UA reference set. The nine scenarios compare NS images to each condition (UA, SHOX, TS, XLH, SRS, HCH, MPS, PHP, and ACH). Feature ranking was derived by summing the ROC-based rank and the t-test-based rank. Box colors indicate diagnostic groups: UA (blue), SHOX (orange), NS (teal), TS (yellow), XLH (green), SRS (red), HCH (purple), MPS (pink), PHP (brown), and ACH (grey). Benjamini-Hochberg-adjusted p-values for each pairwise comparison are shown in brackets above the box pairs.

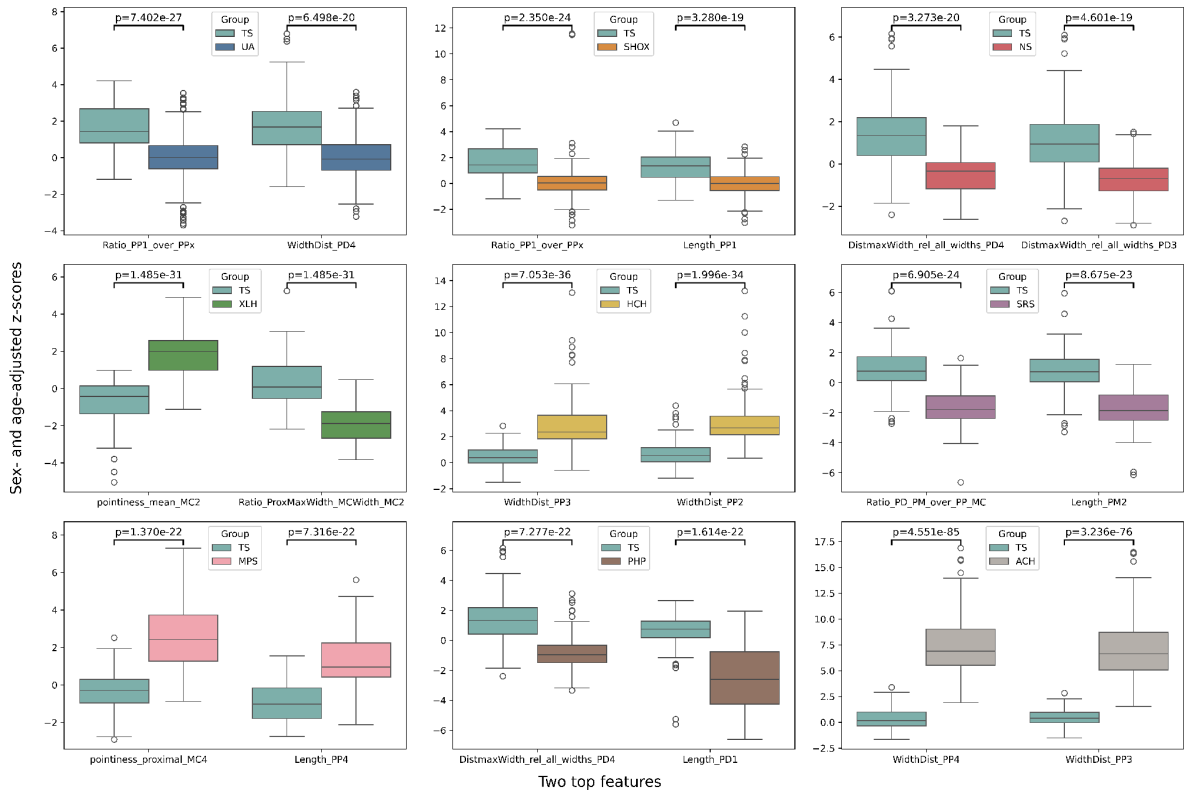

**Supplementary Figure 9 Boxplots of the top-ranked features in the nine “TS vs One” scenarios.** Each y-axis shows the sex- and age-adjusted z-score relative to the UA reference set. The nine scenarios compare TS images to each condition (UA, SHOX, NS, XLH, SRS, HCH, MPS, PHP, and ACH). Feature ranking was derived by summing the ROC-based rank and the t-test-based rank. Box colors indicate diagnostic groups: UA (blue), SHOX (orange), NS (teal), TS (yellow), XLH (green), SRS (red), HCH (purple), MPS (pink), PHP (brown), and ACH (grey). Benjamini-Hochberg-adjusted p-values for each pairwise comparison are shown in brackets above the box pairs.

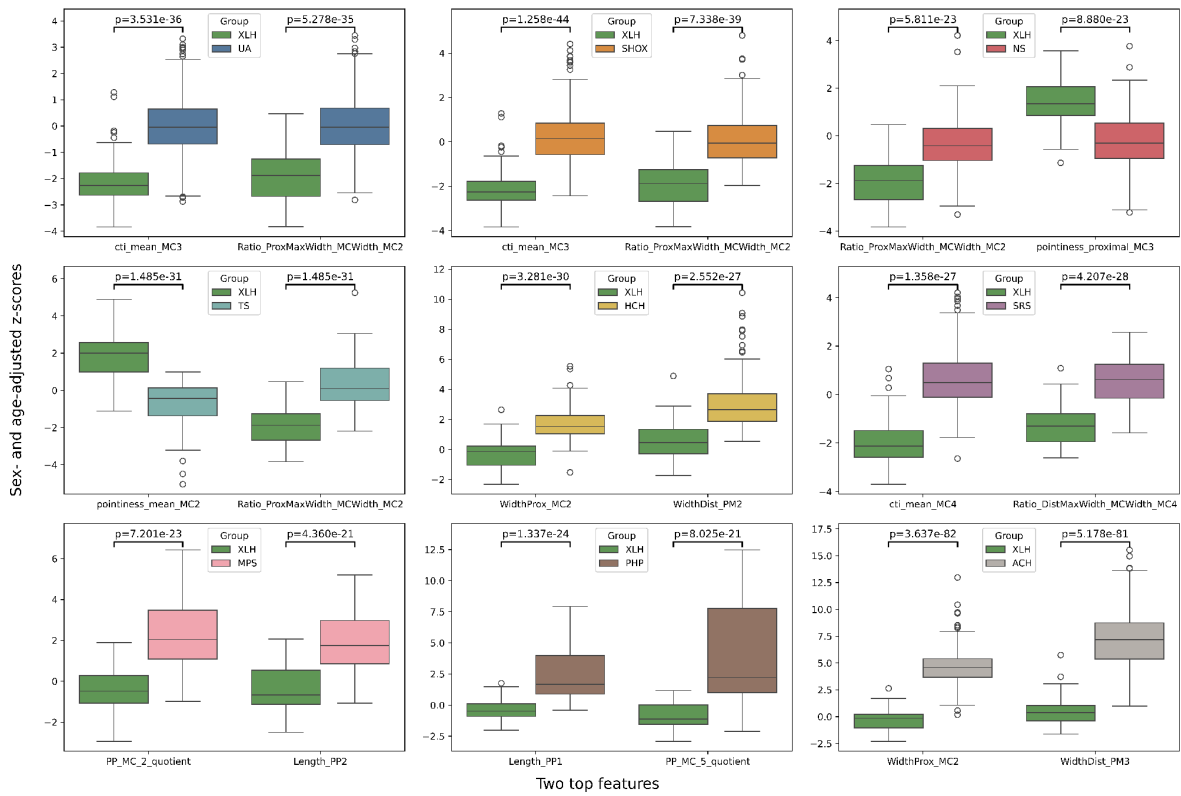

**Supplementary Figure 10** Boxplots of the top-ranked features in the nine “XLH vs One” scenarios. Each y-axis shows the sex- and age-adjusted z-score relative to the UA reference set. The nine scenarios compare XLH images to each condition (UA, SHOX, NS, TS, SRS, HCH, MPS, PHP, and ACH). Feature ranking was derived by summing the ROC-based rank and the t-test-based rank. Box colors indicate diagnostic groups: UA (blue), SHOX (orange), NS (teal), TS (yellow), XLH (green), SRS (red), HCH (purple), MPS (pink), PHP (brown), and ACH (grey). Benjamini-Hochberg-adjusted p-values for each pairwise comparison are shown in brackets above the box pairs.

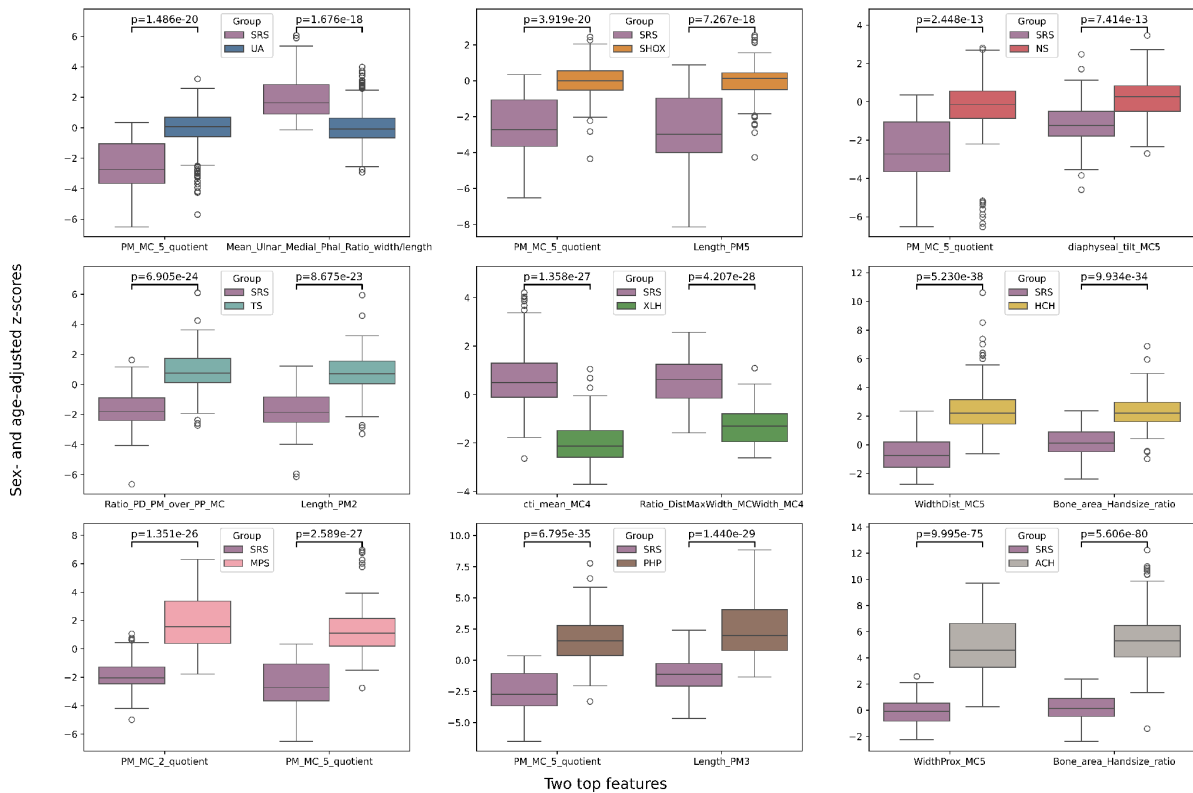

**Supplementary Figure 11 Boxplots of the top-ranked features in the nine “SRS vs One” scenarios.** Each y-axis shows the sex- and age-adjusted z-score relative to the UA reference set. The nine scenarios compare SRS images to each condition (UA, SHOX, NS, TS, XLH, HCH, MPS, PHP, and ACH). Feature ranking was derived by summing the ROC-based rank and the t-test-based rank. Box colors indicate diagnostic groups: UA (blue), SHOX (orange), NS (teal), TS (yellow), XLH (green), SRS (red), HCH (purple), MPS (pink), PHP (brown), and ACH (grey). Benjamini-Hochberg-adjusted p-values for each pairwise comparison are shown in brackets above the box pairs.

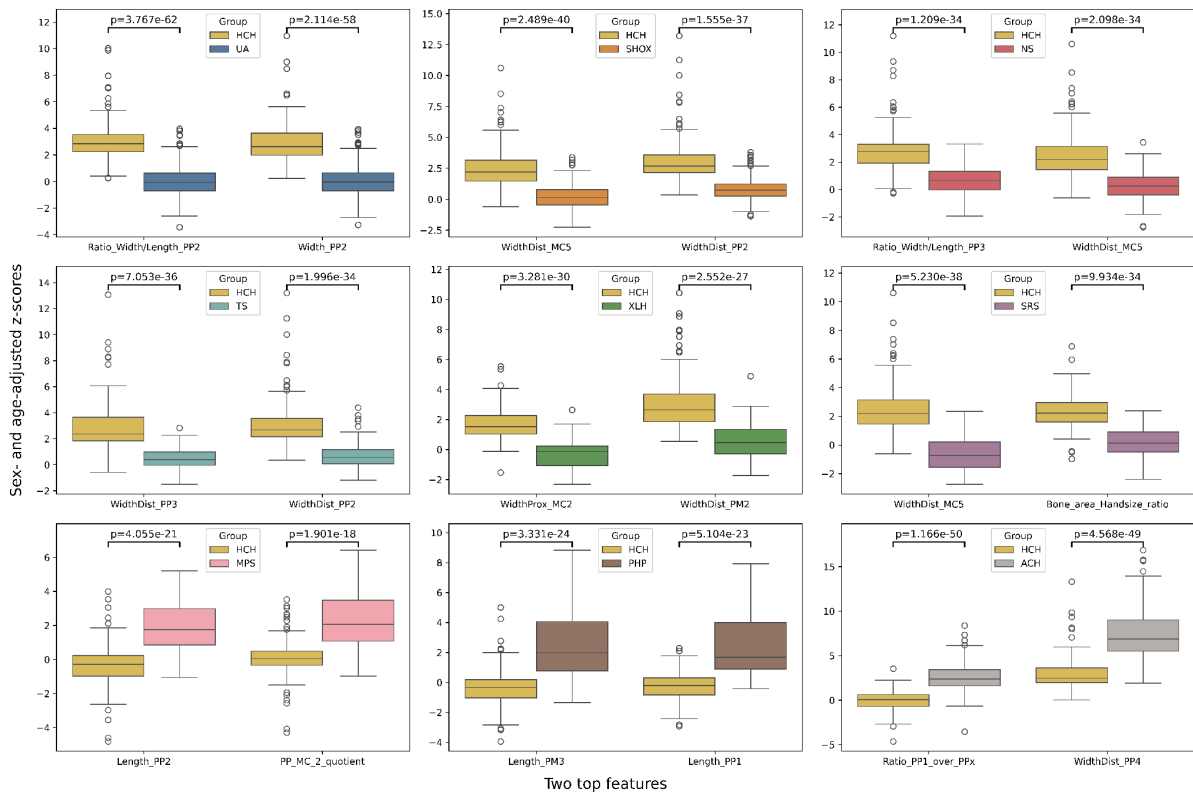

**Supplementary Figure 12 Boxplots of the top-ranked features in the nine “HCH vs One” scenarios.** Each y-axis shows the sex- and age-adjusted z-score relative to the UA reference set. The nine scenarios compare HCH images to each condition (UA, SHOX, NS, TS, XLH, SRS, MPS, PHP, and ACH). Feature ranking was derived by summing the ROC-based rank and the t-test-based rank. Box colors indicate diagnostic groups: UA (blue), SHOX (orange), NS (teal), TS (yellow), XLH (green), SRS (red), HCH (purple), MPS (pink), PHP (brown), and ACH (grey). Benjamini-Hochberg-adjusted p-values for each pairwise comparison are shown in brackets above the box pairs.

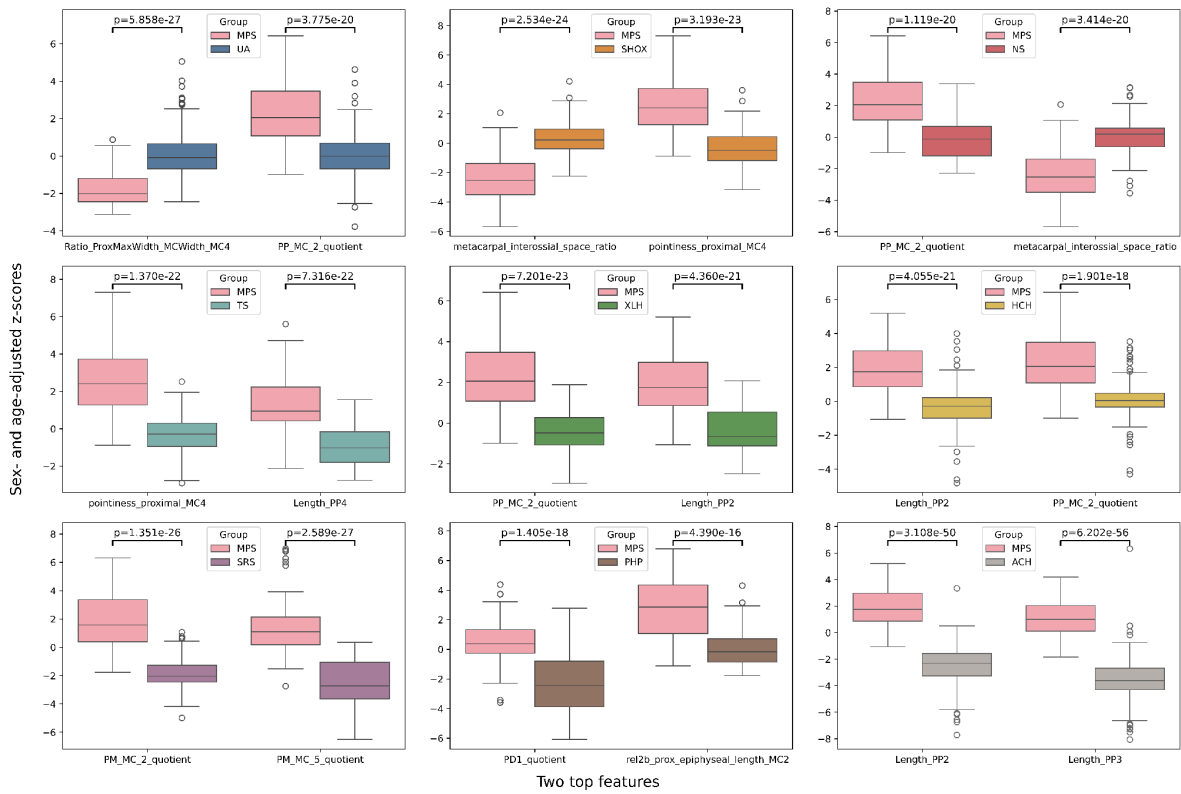

**Supplementary Figure 13 Boxplots of the top-ranked features in the nine “MPS vs One” scenarios.** Each y-axis shows the sex- and age-adjusted z-score relative to the UA reference set. The nine scenarios compare MPS images to each condition (UA, SHOX, NS, TS, XLH, SRS, HCH, PHP, and ACH). Feature ranking was derived by summing the ROC-based rank and the t-test-based rank. Box colors indicate diagnostic groups: UA (blue), SHOX (orange), NS (teal), TS (yellow), XLH (green), SRS (red), HCH (purple), MPS (pink), PHP (brown), and ACH (grey). Benjamini-Hochberg-adjusted p-values for each pairwise comparison are shown in brackets above the box pairs.

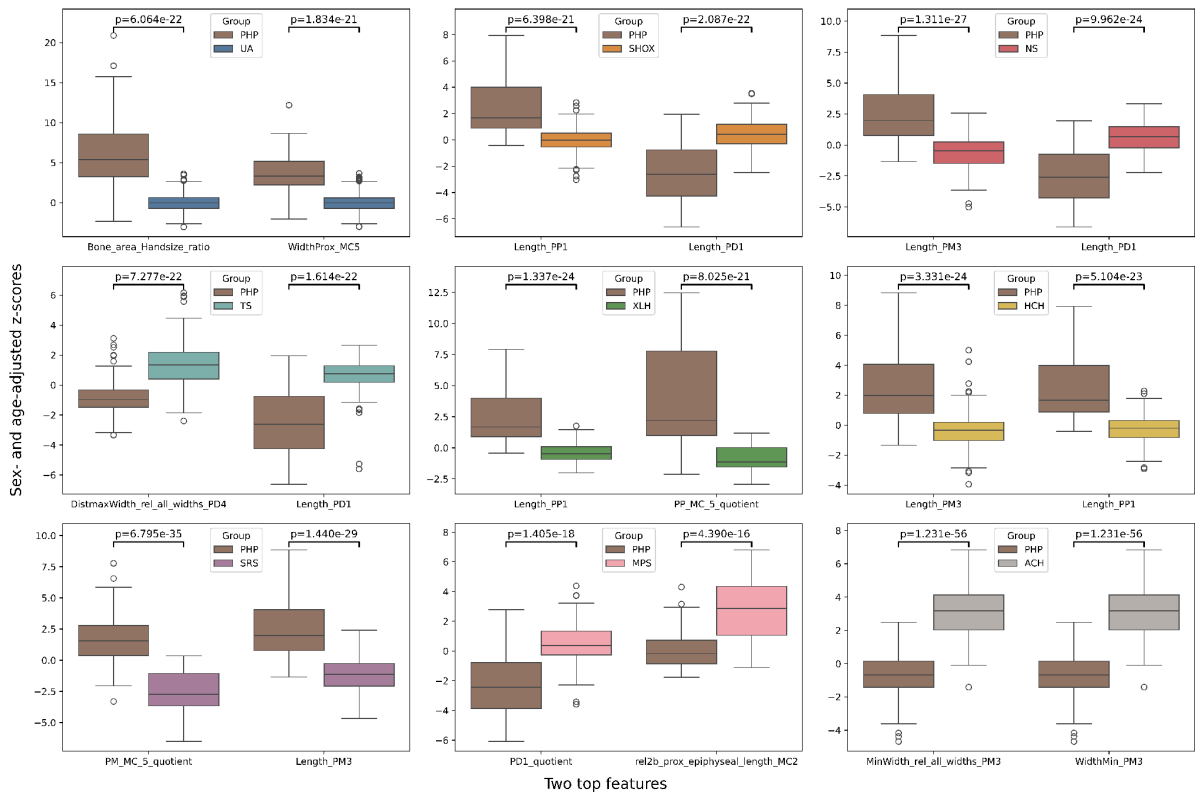

**Supplementary Figure 14** Boxplots of the top-ranked features in the nine “PHP vs One” scenarios. Each y-axis shows the sex- and age-adjusted z-score relative to the UA reference set. The nine scenarios compare PHP images to each condition (UA, SHOX, NS, TS, XLH, SRS, HCH, MPS, and ACH). Feature ranking was derived by summing the ROC-based rank and the t-test-based rank. Box colors indicate diagnostic groups: UA (blue), SHOX (orange), NS (teal), TS (yellow), XLH (green), SRS (red), HCH (purple), MPS (pink), PHP (brown), and ACH (grey). Benjamini-Hochberg-adjusted p-values for each pairwise comparison are shown in brackets above the box pairs.

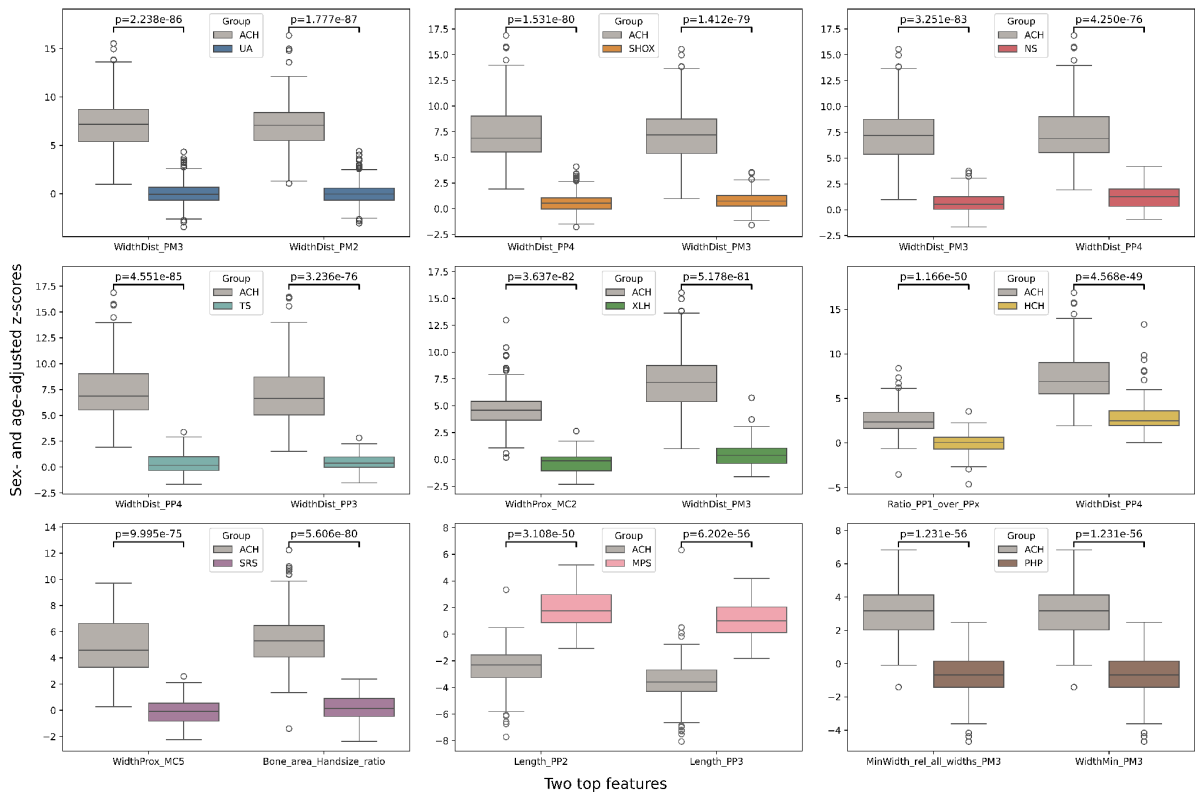

**Supplementary Figure 15** Boxplots of the top-ranked features in the nine “ACH vs One” scenarios. Each y-axis shows the sex- and age-adjusted z-score relative to the UA reference set. The nine scenarios compare ACH images to each condition (UA, SHOX, NS, TS, XLH, SRS, HCH, MPS, and PHP). Feature ranking was derived by summing the ROC-based rank and the t-test-based rank. Box colors indicate diagnostic groups: UA (blue), SHOX (orange), NS (red), TS (yellow), XLH (green), SRS (red), HCH (purple), MPS (pink), PHP (brown), and ACH (grey). Benjamini-Hochberg-adjusted p-values for each pairwise comparison are shown in brackets above the box pairs.

| <b>Cohort</b>         | <b>N</b> | <b>Mean</b> | <b>SD</b> | <b>Median</b> | <b>Q1</b> | <b>Q3</b> | <b>Min</b> | <b>Max</b> |
|-----------------------|----------|-------------|-----------|---------------|-----------|-----------|------------|------------|
| UA                    | 1353     | 23.15       | 5.00      | 22.59         | 20.52     | 25.05     | 15.15      | 145.59     |
| SHOX                  | 317      | 27.82       | 6.99      | 26.60         | 23.90     | 29.59     | 18.64      | 89.25      |
| NS                    | 134      | 33.17       | 11.46     | 30.72         | 26.30     | 37.13     | 21.65      | 107.87     |
| TS                    | 111      | 33.68       | 10.03     | 30.92         | 27.66     | 36.12     | 16.59      | 67.72      |
| XLH                   | 87       | 32.27       | 6.30      | 31.36         | 27.62     | 37.44     | 20.96      | 57.58      |
| HCH                   | 170      | 36.17       | 21.39     | 31.59         | 27.84     | 36.66     | 21.74      | 273.67     |
| SRS                   | 86       | 36.26       | 14.83     | 33.49         | 29.80     | 39.05     | 21.99      | 142.20     |
| MPS                   | 85       | 128.39      | 230.79    | 46.77         | 35.70     | 68.24     | 20.45      | 1384.07    |
| PHP                   | 104      | 55.14       | 28.78     | 52.10         | 38.46     | 66.79     | 20.12      | 228.28     |
| ACH                   | 189      | 63.93       | 26.67     | 58.02         | 50.99     | 71.03     | 25.89      | 256.33     |
| additional conditions | 18       | 35.60       | 11.99     | 33.25         | 26.03     | 41.58     | 22.65      | 63.69      |

**Supplementary Table 1:** Euclidean radii of hand radiographs in the 550-dimensional feature space.

Descriptive statistics (mean, standard deviation, median, first and third quartiles, minimum, and maximum) of the Euclidean radius for each cohort or condition. The radius reflects the distance of each sample from the UA train/reference in the standardized mean vector high-dimensional phenotypic space. The set of additional conditions consists of 2 radiographs for each of the following conditions: ACAN-related short stature, Digorge syndrome, Down syndrome, Hypophosphatasia, KBG syndrome, Léri-Weill dyschondrosteosis, Maffucci syndrome, Osteogenesis imperfecta, type I, Pseudoachondroplasia.

| Cohort | Feature                            | Number of scenarios | mean combined rank |                                                      |
|--------|------------------------------------|---------------------|--------------------|------------------------------------------------------|
| UA     | Width_PP2                          | 2                   | 4.5                | HCH_Hea, Hea_SHO                                     |
| UA     | WidthDist_PP2                      | 2                   | 6                  | HCH_Hea, Hea_Noo                                     |
| UA     | WidthDist_PM2                      | 2                   | 7.5                | ACH_Hea, Hea_SHO                                     |
| SHOX   | pointiness_proximal_MC4            | 2                   | 4                  | MPS_SHO, Noo_SHO                                     |
| SHOX   | Length_PP1                         | 2                   | 4                  | PHP_SHO, SHO_Tur                                     |
| SHOX   | metacarpal_interossial_space_ratio | 2                   | 4                  | MPS_SHO, PHP_SHO                                     |
| SRS    | PM_MC_5_quotient                   | 5                   | 2.4                | Hea_SRS, MPS_SRS, Noo_SRS, PHP_SRS, SHO_SRS          |
| SRS    | PM_MC_2_quotient                   | 2                   | 4                  | Hea_SRS, MPS_SRS                                     |
| SRS    | Ratio_PD_PM_over_PP_MC             | 1                   | 4                  | SHO_SRS, SRS_Tur                                     |
| NS     | metacarpal_interossial_space_ratio | 2                   | 6                  | MPS_Noo, Noo_XLH                                     |
| NS     | cti_mean_MC2                       | 1                   | 2                  | Noo_SHO                                              |
| NS     | PM_MC_5_quotient                   | 1                   | 2                  | Noo_SRS                                              |
| XLH    | Ratio_ProxMaxWidth_MCWidth_MC2     | 4                   | 3.75               | Hea_XLH, Noo_XLH, SHO_XLH, Tur_XLH                   |
| XLH    | cti_mean_MC4                       | 3                   | 5                  | Hea_XLH, SHO_XLH, SRS_XLH                            |
| XLH    | cti_mean_MC3                       | 2                   | 2                  | Hea_XLH, SHO_XLH                                     |
| TS     | Ratio_PP1_over_PPx                 | 2                   | 2                  | Hea_Tur, SHO_Tur                                     |
| TS     | DistmaxWidth_rel_all_widths_PD4    | 2                   | 2.5                | Noo_Tur, PHP_Tur                                     |
| TS     | WidthDist_PP3                      | 2                   | 3                  | ACH_Tur, HCH_Tur                                     |
| HCH    | WidthDist_MC5                      | 3                   | 3.666666666666667  | HCH_Noo, HCH_SHO, HCH_SRS                            |
| HCH    | WidthDist_PP2                      | 3                   | 6.333333333333333  | HCH_Hea, HCH_SHO, HCH_Tur                            |
| HCH    | WidthProx_MC2                      | 2                   | 4                  | ACH_HCH, HCH_XLH                                     |
| ACH    | WidthDist_PP4                      | 6                   | 4.666666666666667  | ACH_HCH, ACH_Hea, ACH_Noo, ACH_SHO, ACH_Tur, ACH_XLH |
| ACH    | WidthDist_PM3                      | 5                   | 5.4                | ACH_Hea, ACH_Noo, ACH_SHO, ACH_SRS, ACH_XLH          |
| ACH    | WidthDist_PM2                      | 4                   | 7                  | ACH_Hea, ACH_Noo, ACH_SHO, ACH_Tur                   |
| PHP    | Length_PP1                         | 4                   | 4.25               | HCH_PHP, Hea_PHP, PHP_SHO, PHP_XLH                   |
| PHP    | Length_PD1                         | 4                   | 5.5                | MPS_PHP, Noo_PHP, PHP_SHO, PHP_Tur                   |
| PHP    | Length_PM3                         | 3                   | 3.666666666666667  | HCH_PHP, Noo_PHP, PHP_SRS                            |
| MPS    | PP_MC_2_quotient                   | 5                   | 4.6                | HCH_MPS, Hea_MPS, MPS_Noo, MPS_SRS, MPS_XLH          |
| MPS    | Length_PP2                         | 3                   | 3.666666666666667  | ACH_MPS, HCH_MPS, MPS_XLH                            |
| MPS    | metacarpal_interossial_space_ratio | 3                   | 5.333333333333333  | Hea_MPS, MPS_Noo, MPS_SHO                            |

**Supplementary Table 2: Top 3 discriminative features per affected cohort derived from its 9 pairwise one-vs-one comparisons with other cohorts.** The final ranking per disorder reflects how frequently a feature appeared among the top three features across the relevant OvO scenarios.

| Scenario   | Feature name                                      | n (radiographs)<br>Group1/<br>Group2 | Mean(SD) score<br>Group1/Group2 | Mean(SD)<br>Group1/Group2<br>(Z-score) | Absolute<br>Hedges'<br>g | Absolute<br>T-score | adjusted<br>p-value | Rank<br>Absolute<br>T-score | ROC<br>AUC<br>Adjusted | Rank<br>ROC<br>AUC<br>Adjusted | Combined Rank |
|------------|---------------------------------------------------|--------------------------------------|---------------------------------|----------------------------------------|--------------------------|---------------------|---------------------|-----------------------------|------------------------|--------------------------------|---------------|
| UA vs SHOX | Width_PP2                                         | 1353 / 317                           | 0.014 (0.002) / 0.016 (0.002)   | 0.004 (1.001) / 1.018 (0.906)          | 1.061                    | 17.6                | 1.079e-51           | 1                           | 0.778                  | 1                              | 1             |
| UA vs SHOX | Ratio_Width/<br>Length_PP4                        | 1353 / 317                           | 0.213 (0.034) / 0.24 (0.026)    | 0.006 (0.994) / 0.939 (0.938)          | 0.966                    | 15.8                | 1.916e-43           | 2                           | 0.759                  | 4                              | 3             |
| UA vs SHOX | WidthDist_PM2                                     | 1353 / 317                           | 0.013 (0.001) / 0.014 (0.001)   | 0.003 (0.998) / 0.898 (0.901)          | 0.942                    | 15.6                | 3.705e-43           | 4                           | 0.755                  | 5                              | 4.5           |
| UA vs NS   | Width_PM2                                         | 1353 / 134                           | 0.012 (0.002) / 0.014 (0.002)   | 0.005 (1.003) / 1.495 (1.215)          | 1.337                    | 13.7                | 3.776e-26           | 2                           | 0.835                  | 2                              | 2             |
| UA vs NS   | WidthDist_PP2                                     | 1353 / 134                           | 0.016 (0.002) / 0.018 (0.001)   | 0.005 (1.005) / 1.381 (1.045)          | 1.342                    | 14.6                | 2.277e-28           | 1                           | 0.834                  | 3                              | 2             |
| UA vs NS   | Width_PM4                                         | 1353 / 134                           | 0.013 (0.002) / 0.014 (0.002)   | 0.009 (1.000) / 1.276 (1.029)          | 1.248                    | 13.6                | 3.776e-26           | 3                           | 0.818                  | 5                              | 4             |
| UA vs TS   | Ratio_PP1_<br>over_PPx                            | 1353 / 111                           | 0.769 (0.044) / 0.821 (0.038)   | 0.006 (0.997) / 1.702 (1.157)          | 1.569                    | 15                  | 7.402e-27           | 1                           | 0.87                   | 1                              | 1             |
| UA vs TS   | WidthDist_PD4                                     | 1353 / 111                           | 0.01 (0.001) / 0.011 (0.002)    | 0.007 (0.995) / 1.701 (1.464)          | 1.352                    | 12                  | 6.498e-20           | 3                           | 0.842                  | 2                              | 2.5           |
| UA vs TS   | Ratio_DistMaxWidth_M<br>CWidth_PD4                | 1353 / 111                           | 1.28 (0.117) / 1.48 (0.196)     | 0.012 (0.992) / 1.937 (1.734)          | 1.362                    | 11.5                | 4.341e-19           | 5                           | 0.835                  | 3                              | 4             |
| UA vs XLH  | cti_mean_MC3                                      | 1353 / 87                            | 0.5 (0.092) / 0.362 (0.067)     | -0.003 (0.993) / -2.147 (0.904)        | 2.256                    | 21.3                | 3.531e-36           | 1                           | 0.942                  | 1                              | 1             |
| UA vs XLH  | Ratio_ProxMaxWidth_M<br>CWidth_MC2                | 1353 / 87                            | 1.95 (0.257) / 1.64 (0.217)     | -0.001 (0.995) / -1.961 (0.869)        | 2.097                    | 20.2                | 5.278e-35           | 2                           | 0.933                  | 2                              | 2             |
| UA vs XLH  | cti_mean_MC4                                      | 1353 / 87                            | 0.501 (0.091) / 0.372 (0.067)   | -0.003 (0.998) / -2.020 (0.923)        | 2.098                    | 19.7                | 5.372e-34           | 4                           | 0.929                  | 3                              | 3.5           |
| UA vs HCH  | Ratio_Width/<br>Length_PP2                        | 1353 / 170                           | 0.233 (0.035) / 0.305 (0.055)   | 0.005 (1.000) / 3.032 (1.470)          | 2.406                    | 26.1                | 3.767e-62           | 2                           | 0.974                  | 2                              | 2             |
| UA vs HCH  | Width_PP2                                         | 1353 / 170                           | 0.014 (0.002) / 0.018 (0.004)   | 0.004 (1.001) / 2.894 (1.492)          | 2.273                    | 24.6                | 2.114e-58           | 3                           | 0.967                  | 4                              | 3.5           |
| UA vs HCH  | WidthDist_PP2                                     | 1353 / 170                           | 0.016 (0.002) / 0.02 (0.003)    | 0.005 (1.005) / 3.137 (1.749)          | 2.195                    | 22.9                | 9.072e-54           | 7                           | 0.977                  | 1                              | 4             |
| UA vs SRS  | PM_MC_5_<br>quotient                              | 1353 / 86                            | 0.362 (0.035) / 0.272 (0.06)    | 0.010 (0.991) / -2.636 (1.813)         | 1.809                    | 13.4                | 1.486e-20           | 2                           | 0.901                  | 1                              | 1.5           |
| UA vs SRS  | PM_MC_2_<br>quotient                              | 1353 / 86                            | 0.347 (0.022) / 0.313 (0.024)   | 0.001 (1.006) / -1.722 (1.161)         | 1.585                    | 13.4                | 8.325e-21           | 1                           | 0.862                  | 4                              | 2.5           |
| UA vs SRS  | Mean_Ulnar_Medial_Ph<br>al_Ratio_wi<br>dth/length | 1353 / 86                            | 0.337 (0.06) / 0.424 (0.07)     | 0.003 (0.997) / 1.974 (1.477)          | 1.563                    | 12.2                | 1.676e-18           | 3                           | 0.882                  | 2                              | 2.5           |
| UA vs MPS  | Ratio_ProxMaxWidth_M<br>CWidth_MC4                | 1353 / 85                            | 1.81 (0.303) / 1.27 (0.295)     | -0.008 (0.997) / -1.766 (0.953)        | 1.803                    | 16.5                | 5.858e-27           | 1                           | 0.894                  | 3                              | 2             |
| UA vs MPS  | PP_MC_2_<br>quotient                              | 1353 / 85                            | 0.609 (0.031) / 0.682 (0.052)   | -0.003 (0.995) / 2.348 (1.671)         | 1.709                    | 12.8                | 3.775e-20           | 5                           | 0.897                  | 2                              | 3.5           |
| UA vs MPS  | metacarpal_interossial_<br>space_ratio            | 1353 / 85                            | 0.89 (0.125) / 0.59 (0.205)     | -0.011 (0.993) / -2.368 (1.618)        | 1.755                    | 13.3                | 1.099e-20           | 4                           | 0.885                  | 6                              | 5             |
| UA vs PHP  | Bone_area_Handsize_ratio                          | 1353 / 104                           | 0.033 (0.002) / 0.044 (0.008)   | 0.000 (0.992) / 5.672 (4.262)          | 1.832                    | 13.5                | 6.064e-22           | 1                           | 0.89                   | 1                              | 1             |

|                  |               |            |                               |                                |       |      |           |   |       |   |     |
|------------------|---------------|------------|-------------------------------|--------------------------------|-------|------|-----------|---|-------|---|-----|
| <b>UA vs PHP</b> | WidthProx_MC5 | 1353 / 104 | 0.019 (0.002) / 0.024 (0.004) | -0.002 (0.999) / 3.449 (2.666) | 1.713 | 13.1 | 1.834e-21 | 2 | 0.869 | 4 | 3   |
| <b>UA vs PHP</b> | Length_PP1    | 1353 / 104 | 0.047 (0.002) / 0.051 (0.004) | 0.003 (0.996) / 2.445 (1.981)  | 1.557 | 12.5 | 1.378e-20 | 6 | 0.881 | 2 | 4   |
| <b>UA vs ACH</b> | WidthDist_PM3 | 1353 / 189 | 0.014 (0.002) / 0.021 (0.003) | 0.008 (0.994) / 7.438 (2.800)  | 3.535 | 36.2 | 2.238e-86 | 2 | 0.999 | 3 | 2.5 |
| <b>UA vs ACH</b> | WidthDist_PP4 | 1353 / 189 | 0.016 (0.002) / 0.024 (0.003) | 0.004 (0.998) / 7.374 (2.840)  | 3.46  | 35.4 | 8.110e-85 | 5 | 0.999 | 1 | 3   |
| <b>UA vs ACH</b> | WidthDist_PM2 | 1353 / 189 | 0.013 (0.001) / 0.019 (0.003) | 0.003 (0.998) / 7.109 (2.637)  | 3.563 | 36.7 | 1.777e-87 | 1 | 0.998 | 5 | 3   |

**Supplementary Table 3.**

**Statistics of the highest-ranked features for differentiating between UA and each affected class.**

The table lists the three highest-ranked features for each “UA vs One” scenario. n denotes the number of images in the affected class to which the UA group is compared. The reported means and standard deviations represent the sex- and age-adjusted z-scores of the affected group relative to the UA training/reference set. The t-value and p-value are computed from the z-score distributions of the two groups. The absolute t-value was used to rank all 550 features within each scenario, yielding the t-test rank. The adjusted ROC AUC, defined as the maximum of ROC and (1 – ROC), calculated from the same z-scores, was used to generate a second ranking, the ROC-AUC rank. The sum of the t-test rank and the ROC-AUC rank provided the final combined score used to identify the top three features per scenario.

| Scenario           | Feature name                     | n (radiographs) Group1/ Group2 | Mean(SD) Group1/Group2        | Mean(SD) Z-score Group1/Group2 | Absolute Hedg es' g | Absolute T-score | Benjamin i-Hochber g adjusted p-value | Rank Absolute T-score | ROC AUC Adjusted | Rank ROC AUC Adjusted | Combine d Rank |
|--------------------|----------------------------------|--------------------------------|-------------------------------|--------------------------------|---------------------|------------------|---------------------------------------|-----------------------|------------------|-----------------------|----------------|
| <b>SHOX vs UA</b>  | Width_PP2                        | 317 / 1350                     | 0.016 (0.002) / 0.014 (0.002) | 1.018 (0.906) / 0.004 (1.001)  | 1.061               | 17.6             | 1.079e-51                             | 1                     | 0.778            | 1                     | 1              |
| <b>SHOX vs UA</b>  | Ratio_Width/L ength_PP4          | 317 / 1350                     | 0.24 (0.026) / 0.213 (0.034)  | 0.939 (0.938) / 0.006 (0.994)  | 0.966               | 15.8             | 1.916e-43                             | 2                     | 0.759            | 4                     | 3              |
| <b>SHOX vs UA</b>  | WidthDist_PM 2                   | 317 / 1350                     | 0.014 (0.001) / 0.013 (0.001) | 0.898 (0.901) / 0.003 (0.998)  | 0.942               | 15.6             | 3.705e-43                             | 4                     | 0.755            | 5                     | 4.5            |
| <b>SHOX vs NS</b>  | cti_mean_MC2                     | 317 / 134                      | 0.514 (0.08) / 0.462 (0.082)  | 0.109 (1.320) / -1.083 (1.309) | 0.905               | 8.8              | 1.084e-13                             | 1                     | 0.731            | 1                     | 1              |
| <b>SHOX vs NS</b>  | pointiness_pro ximal_MC4         | 317 / 134                      | 0.795 (0.068) / 0.829 (0.065) | -0.377 (1.102) / 0.391 (0.931) | 0.752               | 7.6              | 1.328e-10                             | 2                     | 0.703            | 2                     | 2              |
| <b>SHOX vs NS</b>  | Ratio_DistMax Width_MCWidt h_PD1 | 317 / 134                      | 0.924 (0.086) / 0.877 (0.077) | 0.004 (1.147) / -0.764 (0.933) | 0.734               | 7.4              | 1.778e-10                             | 3                     | 0.69             | 3                     | 3              |
| <b>SHOX vs TS</b>  | Ratio_PP1_ov er_PPx              | 317 / 111                      | 0.763 (0.051) / 0.821 (0.038) | 0.073 (1.236) / 1.702 (1.157)  | 1.358               | 12.5             | 2.350e-24                             | 1                     | 0.887            | 1                     | 1              |
| <b>SHOX vs TS</b>  | Length_PP1                       | 317 / 111                      | 0.046 (0.002) / 0.049 (0.002) | -0.033 (0.886) / 1.353 (1.204) | 1.31                | 11.1             | 3.280e-19                             | 2                     | 0.824            | 2                     | 2              |
| <b>SHOX vs TS</b>  | Ratio_DistMax Width_MCWidt h_PD4 | 317 / 111                      | 1.25 (0.146) / 1.48 (0.196)   | -0.074 (1.391) / 1.937 (1.734) | 1.277               | 11               | 3.280e-19                             | 3                     | 0.823            | 3                     | 3              |
| <b>SHOX vs XLH</b> | cti_mean_MC3                     | 317 / 87                       | 0.482 (0.08) / 0.362 (0.067)  | 0.214 (1.200) / -2.147 (0.904) | 2.217               | 20               | 1.258e-44                             | 1                     | 0.946            | 1                     | 1              |

|             |                                           |           |                               |                                 |       |      |           |   |       |   |     |
|-------------|-------------------------------------------|-----------|-------------------------------|---------------------------------|-------|------|-----------|---|-------|---|-----|
| SHOX vs XLH | Ratio_ProxMaxWidth_MCWidth_MC2            | 317 / 87  | 1.92 (0.266) / 1.64 (0.217)   | 0.058 (1.072) / -1.961 (0.869)  | 2.065 | 18.2 | 7.338e-39 | 2 | 0.938 | 2 | 2   |
| SHOX vs XLH | cti_mean_MC4                              | 317 / 87  | 0.471 (0.072) / 0.372 (0.067) | 0.033 (1.105) / -2.020 (0.923)  | 2.013 | 17.6 | 5.584e-37 | 3 | 0.926 | 3 | 3   |
| SHOX vs HCH | WidthDist_MC5                             | 317 / 170 | 0.017 (0.002) / 0.02 (0.003)  | 0.181 (0.979) / 2.503 (1.638)   | 1.718 | 16.9 | 2.489e-40 | 1 | 0.92  | 4 | 2.5 |
| SHOX vs HCH | WidthDist_PP2                             | 317 / 170 | 0.017 (0.001) / 0.02 (0.003)  | 0.816 (0.870) / 3.137 (1.749)   | 1.678 | 16.3 | 1.555e-37 | 5 | 0.936 | 1 | 3   |
| SHOX vs HCH | WidthDist_MC4                             | 317 / 170 | 0.018 (0.002) / 0.021 (0.003) | 0.157 (0.977) / 2.407 (1.585)   | 1.706 | 16.9 | 2.489e-40 | 2 | 0.911 | 6 | 4   |
| SHOX vs SRS | PM_MC_5_quotient                          | 317 / 86  | 0.358 (0.03) / 0.272 (0.06)   | -0.016 (0.875) / -2.636 (1.813) | 1.837 | 13   | 3.919e-20 | 1 | 0.904 | 1 | 1   |
| SHOX vs SRS | Length_PM5                                | 317 / 86  | 0.028 (0.002) / 0.022 (0.005) | -0.013 (0.833) / -2.839 (2.192) | 1.701 | 11.7 | 7.267e-18 | 2 | 0.879 | 2 | 2   |
| SHOX vs SRS | Ratio_PD_PM_over_PP_MC                    | 317 / 86  | 0.417 (0.019) / 0.385 (0.024) | 0.125 (1.079) / -1.711 (1.341)  | 1.506 | 11.7 | 5.636e-19 | 3 | 0.862 | 3 | 3   |
| SHOX vs MPS | metacarpal_interosial_space_ratio         | 317 / 85  | 0.922 (0.132) / 0.59 (0.205)  | 0.310 (1.013) / -2.368 (1.618)  | 1.98  | 14.5 | 2.534e-24 | 1 | 0.914 | 1 | 1   |
| SHOX vs MPS | pointiness_proximal_MC4                   | 317 / 85  | 0.795 (0.068) / 0.968 (0.12)  | -0.377 (1.102) / 2.454 (1.782)  | 1.907 | 13.9 | 3.193e-23 | 2 | 0.908 | 2 | 2   |
| SHOX vs MPS | proximal_radial_area/ellips_area/prox_MC4 | 317 / 85  | 1.69 (0.172) / 1.38 (0.221)   | 0.277 (1.069) / -1.683 (1.191)  | 1.728 | 13.8 | 2.534e-24 | 3 | 0.889 | 3 | 3   |
| SHOX vs PHP | Length_PP1                                | 317 / 104 | 0.046 (0.002) / 0.051 (0.004) | -0.033 (0.886) / 2.445 (1.981)  | 1.613 | 12.4 | 6.398e-21 | 3 | 0.902 | 1 | 2   |
| SHOX vs PHP | Length_PD1                                | 317 / 104 | 0.035 (0.002) / 0.031 (0.004) | 0.474 (1.036) / -2.494 (2.225)  | 1.707 | 13.1 | 2.087e-22 | 2 | 0.868 | 3 | 2.5 |
| SHOX vs PHP | metacarpal_interosial_space_ratio         | 317 / 104 | 0.922 (0.132) / 0.7 (0.167)   | 0.310 (1.013) / -1.479 (1.255)  | 1.565 | 13.2 | 4.210e-24 | 1 | 0.862 | 5 | 3   |
| SHOX vs ACH | WidthDist_PP4                             | 317 / 189 | 0.017 (0.002) / 0.024 (0.003) | 0.584 (0.923) / 7.374 (2.840)   | 3.211 | 31.9 | 1.531e-80 | 1 | 0.998 | 1 | 1   |
| SHOX vs ACH | WidthDist_PM3                             | 317 / 189 | 0.015 (0.001) / 0.021 (0.003) | 0.803 (0.807) / 7.438 (2.800)   | 3.216 | 31.8 | 1.412e-79 | 2 | 0.997 | 3 | 2.5 |
| SHOX vs ACH | WidthDist_PM2                             | 317 / 189 | 0.014 (0.001) / 0.019 (0.003) | 0.898 (0.901) / 7.109 (2.637)   | 3.147 | 31.3 | 8.634e-80 | 3 | 0.993 | 5 | 4   |

**Supplementary Table 4.**

**Statistics of the highest-ranked features for differentiating between SHOX and each other class.**

The table lists the three highest-ranked features for each “SHOX vs One” scenario. *n* denotes the number of images in the affected class to which the UA group is compared. The reported means and standard deviations represent the sex- and age-adjusted z-scores of the affected group relative to the UA training/reference set. The t-value and p-value are computed from the z-score distributions of the two groups. The absolute t-value was used to rank all 550 features within each scenario, yielding the t-test rank. The adjusted ROC AUC, defined as the maximum of ROC and (1 – ROC), calculated from the same z-scores, was used to generate a second ranking, the ROC-AUC rank. The sum of the t-test rank and the ROC-AUC rank provided the final combined score used to identify the top three features per scenario.

| Scenario   | Feature name                       | n (radiographs) Group1/Group2 | Mean(SD) Group1/Group2        | Mean(SD) Z-score Group1/Group2 | absolut Hedges' g | Absolute T-score | Benjamin i-Hochberg adjusted p-value | Rank Absolute T-score | ROC AUC Adjusted | Rank ROC AUC Adjusted | Combine d Rank |
|------------|------------------------------------|-------------------------------|-------------------------------|--------------------------------|-------------------|------------------|--------------------------------------|-----------------------|------------------|-----------------------|----------------|
| NS vs UA   | Width_PM2                          | 134 / 1350                    | 0.014 (0.002) / 0.012 (0.002) | 1.49 (1.21) / 0.005 (1.0)      | 1.337             | 13.7             | 3.776e-26                            | 2                     | 0.835            | 2                     | 2              |
| NS vs UA   | WidthDist_PP2                      | 134 / 1350                    | 0.018 (0.001) / 0.016 (0.002) | 1.38 (1.05) / 0.005 (1.01)     | 1.342             | 14.6             | 2.277e-28                            | 1                     | 0.834            | 3                     | 2              |
| NS vs UA   | Width_PM4                          | 134 / 1350                    | 0.014 (0.002) / 0.013 (0.002) | 1.28 (1.03) / 0.009 (1.0)      | 1.248             | 13.6             | 3.776e-26                            | 3                     | 0.818            | 5                     | 4              |
| NS vs SHOX | cti_mean_MC2                       | 134 / 317                     | 0.462 (0.082) / 0.514 (0.08)  | -1.08 (1.31) / 0.109 (1.32)    | 0.905             | 8.8              | 1.084e-13                            | 1                     | 0.731            | 1                     | 1              |
| NS vs SHOX | pointiness_proximal_MC4            | 134 / 317                     | 0.829 (0.065) / 0.795 (0.068) | 0.391 (0.931) / -0.377 (1.1)   | 0.752             | 7.6              | 1.328e-10                            | 2                     | 0.703            | 2                     | 2              |
| NS vs SHOX | Ratio_DistMaxWidth_MCWidth_PD1     | 134 / 317                     | 0.877 (0.077) / 0.924 (0.086) | -0.764 (0.933) / 0.004 (1.15)  | 0.734             | 7.4              | 1.778e-10                            | 3                     | 0.69             | 3                     | 3              |
| NS vs TS   | DistmaxWidth_rel_all_widths_PD4    | 134 / 111                     | 0.044 (0.004) / 0.052 (0.007) | -0.49 (0.879) / 1.39 (1.53)    | 1.506             | 11.5             | 3.273e-20                            | 1                     | 0.874            | 1                     | 1              |
| NS vs TS   | DistmaxWidth_rel_all_widths_PD3    | 134 / 111                     | 0.043 (0.004) / 0.051 (0.007) | -0.723 (0.871) / 1.16 (1.61)   | 1.449             | 11               | 4.601e-19                            | 2                     | 0.867            | 2                     | 2              |
| NS vs TS   | DistmaxWidth_rel_all_widths_PD2    | 134 / 111                     | 0.037 (0.004) / 0.044 (0.007) | -0.65 (0.931) / 1.0 (1.55)     | 1.287             | 9.8              | 1.589e-16                            | 4                     | 0.841            | 3                     | 3.5            |
| NS vs XLH  | Ratio_ProxMaxWidth_MCWidth_MC2     | 134 / 87                      | 1.88 (0.286) / 1.64 (0.217)   | -0.355 (1.11) / -1.96 (0.869)  | 1.607             | 12               | 5.811e-23                            | 1                     | 0.886            | 1                     | 1              |
| NS vs XLH  | pointiness_proximal_MC3            | 134 / 87                      | 0.82 (0.061) / 0.896 (0.045)  | -0.231 (1.16) / 1.43 (0.912)   | 1.586             | 11.9             | 8.880e-23                            | 2                     | 0.874            | 2                     | 2              |
| NS vs XLH  | metacarpal_interossial_space_ratio | 134 / 87                      | 0.893 (0.139) / 0.69 (0.14)   | -0.001 (1.09) / -1.71 (1.15)   | 1.525             | 11               | 6.007e-20                            | 5                     | 0.871            | 3                     | 4              |
| NS vs HCH  | Ratio_Width/Length_PP3             | 134 / 170                     | 0.228 (0.023) / 0.28 (0.054)  | 0.592 (1.04) / 2.86 (1.62)     | 1.665             | 14.8             | 1.209e-34                            | 1                     | 0.916            | 1                     | 1              |
| NS vs HCH  | WidthDist_MC5                      | 134 / 170                     | 0.017 (0.002) / 0.02 (0.003)  | 0.257 (1.01) / 2.5 (1.64)      | 1.648             | 14.7             | 2.098e-34                            | 2                     | 0.912            | 2                     | 2              |
| NS vs HCH  | Ratio_Width/Length_PP2             | 134 / 170                     | 0.253 (0.023) / 0.305 (0.055) | 0.985 (1.0) / 3.03 (1.47)      | 1.622             | 14.4             | 1.062e-33                            | 3                     | 0.9              | 3                     | 3              |
| NS vs SRS  | PM_MC_5_quotient                   | 134 / 86                      | 0.346 (0.058) / 0.272 (0.06)  | -0.387 (1.84) / -2.64 (1.81)   | 1.228             | 8.9              | 2.448e-13                            | 1                     | 0.83             | 1                     | 1              |
| NS vs SRS  | diaphyseal_tilt_MC5                | 134 / 86                      | 1.02 (0.035) / 0.973 (0.036)  | 0.198 (1.1) / -1.18 (1.18)     | 1.206             | 8.7              | 7.414e-13                            | 2                     | 0.811            | 3                     | 2.5            |
| NS vs SRS  | Length_PM5                         | 134 / 86                      | 0.027 (0.004) / 0.022 (0.005) | -0.466 (1.95) / -2.84 (2.19)   | 1.139             | 8.2              | 6.742e-12                            | 6                     | 0.815            | 2                     | 4              |
| NS vs MPS  | PP_MC_2_quotient                   | 134 / 85                      | 0.605 (0.036) / 0.682 (0.052) | -0.173 (1.19) / 2.35 (1.67)    | 1.734             | 12.1             | 1.119e-20                            | 1                     | 0.897            | 1                     | 1              |
| NS vs MPS  | metacarpal_interossial_space_ratio | 134 / 85                      | 0.893 (0.139) / 0.59 (0.205)  | -0.001 (1.09) / -2.37 (1.62)   | 1.712             | 11.9             | 3.414e-20                            | 2                     | 0.886            | 2                     | 2              |
| NS vs MPS  | Length_MC2                         | 134 / 85                      | 0.102 (0.004) / 0.096 (0.005) | 0.54 (1.35) / -1.7 (1.59)      | 1.512             | 10.8             | 2.535e-18                            | 3                     | 0.861            | 4                     | 3.5            |
| NS vs PHP  | Length_PM3                         | 134 / 104                     | 0.041 (0.002) / 0.046 (0.003) | -0.774 (1.43) / 2.41 (1.96)    | 1.844             | 13.9             | 1.311e-27                            | 1                     | 0.921            | 1                     | 1              |
| NS vs PHP  | Length_PD1                         | 134 / 104                     | 0.035 (0.002) / 0.031 (0.004) | 0.625 (1.13) / -2.49 (2.23)    | 1.762             | 13               | 9.962e-24                            | 2                     | 0.876            | 3                     | 2.5            |
| NS vs PHP  | Bone_area_Handsize_ratio           | 134 / 104                     | 0.034 (0.002) / 0.044 (0.008) | 0.776 (0.945) / 5.67 (4.26)    | 1.581             | 11.5             | 1.307e-18                            | 3                     | 0.872            | 4                     | 3.5            |
| NS vs ACH  | WidthDist_PM3                      | 134 / 189                     | 0.015 (0.001) / 0.021 (0.003) | 0.713 (0.992) / 7.44 (2.8)     | 3.195             | 30.4             | 3.251e-83                            | 1                     | 0.996            | 2                     | 1.5            |

|           |               |           |                               |                           |       |      |           |   |       |   |     |
|-----------|---------------|-----------|-------------------------------|---------------------------|-------|------|-----------|---|-------|---|-----|
| NS vs ACH | WidthDist_PP4 | 134 / 189 | 0.017 (0.002) / 0.024 (0.003) | 1.18 (1.08) / 7.37 (2.84) | 2.875 | 27.3 | 4.250e-76 | 4 | 0.996 | 1 | 2.5 |
| NS vs ACH | WidthDist_PM2 | 134 / 189 | 0.014 (0.001) / 0.019 (0.003) | 1.23 (1.04) / 7.11 (2.64) | 2.924 | 27.7 | 7.279e-78 | 2 | 0.987 | 5 | 3.5 |

**Supplementary Table 5.**

**Statistics of the highest-ranked features for differentiating between NS and each other class.**

The table lists the three highest-ranked features for each “NS vs One” scenario. n denotes the number of images in the affected class to which the UA group is compared. The reported means and standard deviations represent the sex- and age-adjusted z-scores of the affected group relative to the UA training/reference set. The t-value and p-value are computed from the z-score distributions of the two groups. The absolute t-value was used to rank all 550 features within each scenario, yielding the t-test rank. The adjusted ROC AUC, defined as the maximum of ROC and (1 – ROC), calculated from the same z-scores, was used to generate a second ranking, the ROC-AUC rank. The sum of the t-test rank and the ROC-AUC rank provided the final combined score used to identify the top three features per scenario.

| Scenario   | Feature name                    | n (radiographs) Group1 /Group 2 | Mean(SD) Group1/Group 2       | Mean(SD) Z-score Group1/Group 2 | Absolute Hedges 'g | Absolute T-score | Benjamini-Hochberg adjusted p-value | Rank Absolute T-score | ROC AUC Adjusted | Rank ROC AUC Adjusted | Combined Rank |
|------------|---------------------------------|---------------------------------|-------------------------------|---------------------------------|--------------------|------------------|-------------------------------------|-----------------------|------------------|-----------------------|---------------|
| TS vs UA   | Ratio_PP1_over_PPx              | 111 / 1350                      | 0.821 (0.038) / 0.769 (0.044) | 1.7 (1.16) / 0.006 (0.997)      | 1.569              | 15               | 7.402e-27                           | 1                     | 0.87             | 1                     | 1             |
| TS vs UA   | WidthDist_PD4                   | 111 / 1350                      | 0.011 (0.002) / 0.01 (0.001)  | 1.7 (1.46) / 0.007 (0.995)      | 1.352              | 12               | 6.498e-20                           | 3                     | 0.842            | 2                     | 2.5           |
| TS vs UA   | Ratio_DistMaxWidth_MCWidth_PD4  | 111 / 1350                      | 1.48 (0.196) / 1.28 (0.117)   | 1.94 (1.73) / 0.012 (0.992)     | 1.362              | 11.5             | 4.341e-19                           | 5                     | 0.835            | 3                     | 4             |
| TS vs SHOX | Ratio_PP1_over_PPx              | 111 / 317                       | 0.821 (0.038) / 0.763 (0.051) | 1.7 (1.16) / 0.073 (1.24)       | 1.358              | 12.5             | 2.350e-24                           | 1                     | 0.887            | 1                     | 1             |
| TS vs SHOX | Length_PP1                      | 111 / 317                       | 0.049 (0.002) / 0.046 (0.002) | 1.35 (1.2) / -0.033 (0.886)     | 1.31               | 11.1             | 3.280e-19                           | 2                     | 0.824            | 2                     | 2             |
| TS vs SHOX | Ratio_DistMaxWidth_MCWidth_PD4  | 111 / 317                       | 1.48 (0.196) / 1.25 (0.146)   | 1.94 (1.73) / -0.074 (1.39)     | 1.277              | 11               | 3.280e-19                           | 3                     | 0.823            | 3                     | 3             |
| TS vs NS   | DistmaxWidth_rel_all_widths_PD4 | 111 / 134                       | 0.052 (0.007) / 0.044 (0.004) | 1.39 (1.53) / -0.49 (0.879)     | 1.506              | 11.5             | 3.273e-20                           | 1                     | 0.874            | 1                     | 1             |
| TS vs NS   | DistmaxWidth_rel_all_widths_PD3 | 111 / 134                       | 0.051 (0.007) / 0.043 (0.004) | 1.16 (1.61) / -0.723 (0.871)    | 1.449              | 11               | 4.601e-19                           | 2                     | 0.867            | 2                     | 2             |
| TS vs NS   | DistmaxWidth_rel_all_widths_PD2 | 111 / 134                       | 0.044 (0.007) / 0.037 (0.004) | 1.0 (1.55) / -0.65 (0.931)      | 1.287              | 9.8              | 1.589e-16                           | 4                     | 0.841            | 3                     | 3.5           |
| TS vs XLH  | pointiness_mean_MC2             | 111 / 87                        | 0.733 (0.048) / 0.834 (0.043) | -0.72 (1.17) / 1.86 (1.21)      | 2.164              | 15.1             | 1.485e-31                           | 1                     | 0.951            | 1                     | 1             |
| TS vs XLH  | pointiness_mean_MC3             | 111 / 87                        | 0.761 (0.05) / 0.861 (0.048)  | -0.739 (1.26) / 1.8 (1.15)      | 2.09               | 14.7             | 4.648e-31                           | 3                     | 0.947            | 2                     | 2.5           |
| TS vs XLH  | Ratio_ProxMaxWidth_MCWidth_MC2  | 111 / 87                        | 2.04 (0.267) / 1.64 (0.217)   | 0.347 (1.3) / -1.96 (0.869)     | 2.082              | 14.9             | 1.485e-31                           | 2                     | 0.944            | 3                     | 2.5           |
| TS vs HCH  | WidthDist_PP3                   | 111 / 170                       | 0.017 (0.001) / 0.021 (0.004) | 0.456 (0.841) / 2.89 (1.78)     | 1.742              | 15.4             | 7.053e-36                           | 1                     | 0.941            | 1                     | 1             |
| TS vs HCH  | WidthDist_PP4                   | 111 / 170                       | 0.016 (0.001) / 0.019 (0.003) | 0.394 (0.995) / 2.91 (1.74)     | 1.765              | 15.3             | 4.461e-36                           | 2                     | 0.934            | 3                     | 2.5           |

|                  |                                     |           |                               |                              |       |      |           |   |       |   |     |
|------------------|-------------------------------------|-----------|-------------------------------|------------------------------|-------|------|-----------|---|-------|---|-----|
| <b>TS vs HCH</b> | WidthDist_PP2                       | 111 / 170 | 0.016 (0.001) / 0.02 (0.003)  | 0.711 (1.0) / 3.14 (1.75)    | 1.698 | 14.8 | 1.996e-34 | 3 | 0.936 | 2 | 2.5 |
| <b>TS vs SRS</b> | Ratio_PD_PM_over_PP_MC              | 111 / 86  | 0.425 (0.024) / 0.385 (0.024) | 0.832 (1.51) / -1.71 (1.34)  | 1.777 | 12.5 | 6.905e-24 | 1 | 0.901 | 1 | 1   |
| <b>TS vs SRS</b> | Length_PM2                          | 111 / 86  | 0.036 (0.002) / 0.033 (0.002) | 0.706 (1.46) / -1.7 (1.35)   | 1.71  | 12   | 8.675e-23 | 3 | 0.891 | 3 | 3   |
| <b>TS vs SRS</b> | PD_MC_5_quotient                    | 111 / 86  | 0.337 (0.031) / 0.288 (0.03)  | 1.37 (1.47) / -0.976 (1.33)  | 1.742 | 12.3 | 9.090e-24 | 2 | 0.885 | 4 | 3   |
| <b>TS vs MPS</b> | pointiness_proximal_MC4             | 111 / 85  | 0.779 (0.056) / 0.968 (0.12)  | -0.326 (0.964) / 2.45 (1.78) | 1.933 | 13   | 1.370e-22 | 1 | 0.907 | 2 | 1.5 |
| <b>TS vs MPS</b> | Length_PP4                          | 111 / 85  | 0.062 (0.002) / 0.067 (0.003) | -0.957 (1.04) / 1.37 (1.51)  | 1.784 | 12.1 | 7.316e-22 | 6 | 0.909 | 1 | 3.5 |
| <b>TS vs MPS</b> | proximal_rad_area/ellips_approx_MC4 | 111 / 85  | 1.77 (0.168) / 1.38 (0.221)   | 0.481 (1.17) / -1.68 (1.19)  | 1.822 | 12.7 | 5.520e-24 | 2 | 0.899 | 5 | 3.5 |
| <b>TS vs PHP</b> | DistmaxWidth_rel_all_widths_PD4     | 111 / 104 | 0.052 (0.007) / 0.042 (0.006) | 1.39 (1.53) / -0.813 (1.26)  | 1.57  | 11.6 | 7.277e-22 | 2 | 0.882 | 1 | 1.5 |
| <b>TS vs PHP</b> | Length_PD1                          | 111 / 104 | 0.035 (0.002) / 0.031 (0.004) | 0.582 (1.2) / -2.49 (2.23)   | 1.713 | 12.5 | 1.614e-22 | 1 | 0.872 | 3 | 2   |
| <b>TS vs PHP</b> | Bone_area_Handsize_ratio            | 111 / 104 | 0.034 (0.002) / 0.044 (0.008) | 1.03 (0.901) / 5.67 (4.26)   | 1.502 | 10.9 | 1.841e-17 | 4 | 0.861 | 5 | 4.5 |
| <b>TS vs ACH</b> | WidthDist_PP4                       | 111 / 189 | 0.016 (0.001) / 0.024 (0.003) | 0.394 (0.995) / 7.37 (2.84)  | 3.271 | 30.7 | 4.551e-85 | 1 | 0.999 | 1 | 1   |
| <b>TS vs ACH</b> | WidthDist_PP3                       | 111 / 189 | 0.017 (0.001) / 0.025 (0.004) | 0.456 (0.841) / 7.18 (3.04)  | 3.011 | 28.6 | 3.236e-76 | 2 | 0.998 | 2 | 2   |
| <b>TS vs ACH</b> | WidthDist_PM2                       | 111 / 189 | 0.014 (0.001) / 0.019 (0.003) | 1.07 (1.06) / 7.11 (2.64)    | 2.996 | 27.9 | 2.839e-79 | 3 | 0.99  | 4 | 3.5 |

### Supplementary Table 6.

#### Statistics of the highest-ranked features for differentiating between TS and each other class.

The table lists the three highest-ranked features for each “TS vs One” scenario. n denotes the number of images in the affected class to which the UA group is compared. The reported means and standard deviations represent the sex- and age-adjusted z-scores of the affected group relative to the UA training/reference set. The t-value and p-value are computed from the z-score distributions of the two groups. The absolute t-value was used to rank all 550 features within each scenario, yielding the t-test rank. The adjusted ROC AUC, defined as the maximum of ROC and (1 - ROC), calculated from the same z-scores, was used to generate a second ranking, the ROC-AUC rank. The sum of the t-test rank and the ROC-AUC rank provided the final combined score used to identify the top three features per scenario.

| Scenario           | Feature name                   | n (radiographs) Group1/Group2 | Mean(SD) Group1/Group2        | Mean(SD) Z-score Group1/Group2 | Absolute Hedges' g | Absolute T-score | Benjamini-Hochberg adjusted p-value | Rank Absolute T-score | ROC AUC Adjusted | Rank ROC AUC Adjusted | Combined Rank |
|--------------------|--------------------------------|-------------------------------|-------------------------------|--------------------------------|--------------------|------------------|-------------------------------------|-----------------------|------------------|-----------------------|---------------|
| <b>XLH vs UA</b>   | cti_mean_MC3                   | 87 / 1350                     | 0.362 (0.067) / 0.5 (0.092)   | -2.15 (0.904) / -0.003 (0.993) | 2.256              | 21.3             | 3.531e-36                           | 1                     | 0.942            | 1                     | 1.0           |
| <b>XLH vs UA</b>   | Ratio_ProxMaxWidth_MCWidth_MC2 | 87 / 1350                     | 1.64 (0.217) / 1.95 (0.257)   | -1.96 (0.869) / -0.001 (0.995) | 2.097              | 20.2             | 5.278e-35                           | 2                     | 0.933            | 2                     | 2.0           |
| <b>XLH vs UA</b>   | cti_mean_MC4                   | 87 / 1350                     | 0.372 (0.067) / 0.501 (0.091) | -2.02 (0.923) / -0.003 (0.998) | 2.098              | 19.7             | 5.372e-34                           | 4                     | 0.929            | 3                     | 3.5           |
| <b>XLH vs SHOX</b> | cti_mean_MC3                   | 87 / 317                      | 0.362 (0.067) / 0.482 (0.08)  | -2.15 (0.904) / 0.214 (1.2)    | 2.217              | 20.0             | 1.258e-44                           | 1                     | 0.946            | 1                     | 1.0           |

|                    |                                    |          |                               |                               |       |      |           |   |       |   |     |
|--------------------|------------------------------------|----------|-------------------------------|-------------------------------|-------|------|-----------|---|-------|---|-----|
| <b>XLH vs SHOX</b> | Ratio_ProxMaxWidth_MCWidth_MC2     | 87 / 317 | 1.64 (0.217) / 1.92 (0.266)   | -1.96 (0.869) / 0.058 (1.07)  | 2.065 | 18.2 | 7.338e-39 | 2 | 0.938 | 2 | 2.0 |
| <b>XLH vs SHOX</b> | cti_mean_MC4                       | 87 / 317 | 0.372 (0.067) / 0.471 (0.072) | -2.02 (0.923) / 0.033 (1.11)  | 2.013 | 17.6 | 5.584e-37 | 3 | 0.926 | 3 | 3.0 |
| <b>XLH vs NS</b>   | Ratio_ProxMaxWidth_MCWidth_MC2     | 87 / 134 | 1.64 (0.217) / 1.88 (0.286)   | -1.96 (0.869) / -0.355 (1.11) | 1.607 | 12.0 | 5.811e-23 | 1 | 0.886 | 1 | 1.0 |
| <b>XLH vs NS</b>   | pointiness_proximal_MC3            | 87 / 134 | 0.896 (0.045) / 0.82 (0.061)  | 1.43 (0.912) / -0.231 (1.16)  | 1.586 | 11.9 | 8.88e-23  | 2 | 0.874 | 2 | 2.0 |
| <b>XLH vs NS</b>   | metacarpal_interossial_space_ratio | 87 / 134 | 0.69 (0.14) / 0.893 (0.139)   | -1.71 (1.15) / -0.001 (1.09)  | 1.525 | 11.0 | 6.007e-20 | 5 | 0.871 | 3 | 4.0 |
| <b>XLH vs TS</b>   | pointiness_mean_MC2                | 87 / 111 | 0.834 (0.043) / 0.733 (0.048) | 1.86 (1.21) / -0.72 (1.17)    | 2.164 | 15.1 | 1.485e-31 | 1 | 0.951 | 1 | 1.0 |
| <b>XLH vs TS</b>   | pointiness_mean_MC3                | 87 / 111 | 0.861 (0.048) / 0.761 (0.05)  | 1.8 (1.15) / -0.739 (1.26)    | 2.09  | 14.7 | 4.648e-31 | 3 | 0.947 | 2 | 2.5 |
| <b>XLH vs TS</b>   | Ratio_ProxMaxWidth_MCWidth_MC2     | 87 / 111 | 1.64 (0.217) / 2.04 (0.267)   | -1.96 (0.869) / 0.347 (1.3)   | 2.082 | 14.9 | 1.485e-31 | 2 | 0.944 | 3 | 2.5 |
| <b>XLH vs HCH</b>  | WidthProx_MC2                      | 87 / 170 | 0.023 (0.002) / 0.026 (0.002) | -0.269 (0.988) / 1.71 (1.09)  | 1.893 | 14.6 | 3.281e-30 | 1 | 0.921 | 1 | 1.0 |
| <b>XLH vs HCH</b>  | WidthDist_PM2                      | 87 / 170 | 0.013 (0.001) / 0.016 (0.003) | 0.563 (1.22) / 2.99 (1.72)    | 1.627 | 13.1 | 2.552e-27 | 3 | 0.902 | 3 | 3.0 |
| <b>XLH vs HCH</b>  | WidthDist_PP1                      | 87 / 170 | 0.016 (0.001) / 0.018 (0.002) | 0.113 (0.812) / 2.06 (1.51)   | 1.608 | 13.5 | 3.241e-29 | 2 | 0.899 | 5 | 3.5 |
| <b>XLH vs SRS</b>  | cti_mean_MC4                       | 87 / 86  | 0.372 (0.067) / 0.515 (0.117) | -2.02 (0.923) / 0.759 (1.51)  | 2.208 | 14.6 | 1.358e-27 | 1 | 0.951 | 1 | 1.0 |
| <b>XLH vs SRS</b>  | Ratio_DistMaxWidth_MCWidth_MC4     | 87 / 86  | 1.5 (0.166) / 1.72 (0.187)    | -1.3 (0.804) / 0.558 (0.917)  | 2.15  | 14.2 | 4.207e-28 | 2 | 0.934 | 2 | 2.0 |
| <b>XLH vs SRS</b>  | ProxmaxWidth_rel_all_widths_PP2    | 87 / 86  | 0.095 (0.008) / 0.103 (0.01)  | -1.68 (0.847) / 0.224 (0.914) | 2.147 | 14.2 | 4.207e-28 | 3 | 0.933 | 3 | 3.0 |
| <b>XLH vs MPS</b>  | PP_MC_2_quotient                   | 87 / 85  | 0.596 (0.026) / 0.682 (0.052) | -0.393 (1.02) / 2.35 (1.67)   | 1.97  | 12.9 | 7.201e-23 | 1 | 0.933 | 1 | 1.0 |
| <b>XLH vs MPS</b>  | Length_PP2                         | 87 / 85  | 0.06 (0.002) / 0.065 (0.003)  | -0.418 (1.09) / 1.94 (1.48)   | 1.807 | 11.9 | 4.36e-21  | 3 | 0.897 | 3 | 3.0 |
| <b>XLH vs MPS</b>  | Length_PP5                         | 87 / 85  | 0.049 (0.002) / 0.053 (0.003) | -0.705 (0.986) / 1.66 (1.65)  | 1.732 | 11.4 | 2.269e-19 | 4 | 0.895 | 5 | 4.5 |
| <b>XLH vs PHP</b>  | Length_PP1                         | 87 / 104 | 0.046 (0.002) / 0.051 (0.004) | -0.418 (0.75) / 2.45 (1.98)   | 1.904 | 13.6 | 1.337e-24 | 1 | 0.953 | 1 | 1.0 |
| <b>XLH vs PHP</b>  | PP_MC_5_quotient                   | 87 / 104 | 0.614 (0.032) / 0.754 (0.106) | -0.88 (1.01) / 4.01 (3.92)    | 1.705 | 12.3 | 8.025e-21 | 3 | 0.921 | 2 | 2.5 |
| <b>XLH vs PHP</b>  | Ratio_DistMaxWidth_MCWidth_MC2     | 87 / 104 | 1.48 (0.115) / 1.76 (0.213)   | -1.57 (0.973) / 0.369 (1.15)  | 1.821 | 12.7 | 1.337e-24 | 2 | 0.92  | 3 | 2.5 |
| <b>XLH vs ACH</b>  | WidthProx_MC2                      | 87 / 189 | 0.023 (0.002) / 0.031 (0.003) | -0.269 (0.988) / 4.66 (1.81)  | 3.372 | 29.2 | 3.637e-82 | 1 | 0.995 | 1 | 1.0 |
| <b>XLH vs ACH</b>  | WidthDist_PM3                      | 87 / 189 | 0.014 (0.002) / 0.021 (0.003) | 0.521 (1.25) / 7.44 (2.8)     | 3.181 | 28.4 | 5.178e-81 | 2 | 0.993 | 4 | 3.0 |
| <b>XLH vs ACH</b>  | WidthDist_PP4                      | 87 / 189 | 0.016 (0.002) / 0.024 (0.003) | 0.743 (1.27) / 7.37 (2.84)    | 3.007 | 26.8 | 2.04e-76  | 4 | 0.994 | 3 | 3.5 |

**Supplementary Table 7.**

**Statistics of the highest-ranked features for differentiating between XLH and each other class.**

The table lists the three highest-ranked features for each “XLH vs One” scenario. n denotes the number of images in the affected class to which the UA group is compared. The reported means and standard deviations represent the sex- and age-adjusted z-scores of the affected group relative to the UA training/reference set. The t-value and p-value are computed from the z-score distributions of the two groups. The absolute t-value was used to rank all 550 features within each scenario, yielding the t-test rank. The adjusted ROC AUC, defined as the maximum of ROC and (1 – ROC), calculated from the same z-scores, was used to

generate a second ranking, the ROC-AUC rank. The sum of the t-test rank and the ROC-AUC rank provided the final combined score used to identify the top three features per scenario.

| Scenario    | Feature name              | n (radiographs) Group1/Group 2 | Mean(SD) Group1/Group 2       | Mean(SD) Z-score Group1/Group 2 | Absolut Hedges' g | Absolute T-score | Benjamin i-Hochberg adjusted p-value | Rank Absolute T-score | ROC AUC Adjusted | Rank ROC AUC Adjusted | Combine d Rank |
|-------------|---------------------------|--------------------------------|-------------------------------|---------------------------------|-------------------|------------------|--------------------------------------|-----------------------|------------------|-----------------------|----------------|
| HCH vs UA   | Ratio_Width/Lengt h_PP2   | 170 / 1350                     | 0.305 (0.055) / 0.233 (0.035) | 3.03 (1.47) / 0.005 (1.0)       | 2.406             | 26.1             | 3.767e-62                            | 2                     | 0.974            | 2                     | 2.0            |
| HCH vs UA   | Width_PP2                 | 170 / 1350                     | 0.018 (0.004) / 0.014 (0.002) | 2.89 (1.49) / 0.004 (1.0)       | 2.273             | 24.6             | 2.114e-58                            | 3                     | 0.967            | 4                     | 3.5            |
| HCH vs UA   | WidthDist_PP2             | 170 / 1350                     | 0.02 (0.003) / 0.016 (0.002)  | 3.14 (1.75) / 0.005 (1.01)      | 2.195             | 22.9             | 9.072e-54                            | 7                     | 0.977            | 1                     | 4.0            |
| HCH vs SHOX | WidthDist_MC5             | 170 / 317                      | 0.02 (0.003) / 0.017 (0.002)  | 2.5 (1.64) / 0.181 (0.979)      | 1.718             | 16.9             | 2.489e-40                            | 1                     | 0.92             | 4                     | 2.5            |
| HCH vs SHOX | WidthDist_PP2             | 170 / 317                      | 0.02 (0.003) / 0.017 (0.001)  | 3.14 (1.75) / 0.816 (0.87)      | 1.678             | 16.3             | 1.555e-37                            | 5                     | 0.936            | 1                     | 3.0            |
| HCH vs SHOX | WidthDist_MC4             | 170 / 317                      | 0.021 (0.003) / 0.018 (0.002) | 2.41 (1.58) / 0.157 (0.977)     | 1.706             | 16.9             | 2.489e-40                            | 2                     | 0.911            | 6                     | 4.0            |
| HCH vs NS   | Ratio_Width/Lengt h_PP3   | 170 / 134                      | 0.28 (0.054) / 0.228 (0.023)  | 2.86 (1.62) / 0.592 (1.04)      | 1.665             | 14.8             | 1.209e-34                            | 1                     | 0.916            | 1                     | 1.0            |
| HCH vs NS   | WidthDist_MC5             | 170 / 134                      | 0.02 (0.003) / 0.017 (0.002)  | 2.5 (1.64) / 0.257 (1.01)       | 1.648             | 14.7             | 2.098e-34                            | 2                     | 0.912            | 2                     | 2.0            |
| HCH vs NS   | Ratio_Width/Lengt h_PP2   | 170 / 134                      | 0.305 (0.055) / 0.253 (0.023) | 3.03 (1.47) / 0.985 (1.0)       | 1.622             | 14.4             | 1.062e-33                            | 3                     | 0.9              | 3                     | 3.0            |
| HCH vs TS   | WidthDist_PP3             | 170 / 111                      | 0.021 (0.004) / 0.017 (0.001) | 2.89 (1.78) / 0.456 (0.841)     | 1.742             | 15.4             | 7.053e-36                            | 1                     | 0.941            | 1                     | 1.0            |
| HCH vs TS   | WidthDist_PP4             | 170 / 111                      | 0.019 (0.003) / 0.016 (0.001) | 2.91 (1.74) / 0.394 (0.995)     | 1.765             | 15.3             | 4.461e-36                            | 2                     | 0.934            | 3                     | 2.5            |
| HCH vs TS   | WidthDist_PP2             | 170 / 111                      | 0.02 (0.003) / 0.016 (0.001)  | 3.14 (1.75) / 0.711 (1.0)       | 1.698             | 14.8             | 1.996e-34                            | 3                     | 0.936            | 2                     | 2.5            |
| HCH vs XLH  | WidthProx_MC2             | 170 / 87                       | 0.026 (0.002) / 0.023 (0.002) | 1.71 (1.09) / -0.269 (0.988)    | 1.893             | 14.6             | 3.281e-30                            | 1                     | 0.921            | 1                     | 1.0            |
| HCH vs XLH  | WidthDist_PM2             | 170 / 87                       | 0.016 (0.003) / 0.013 (0.001) | 2.99 (1.72) / 0.563 (1.22)      | 1.627             | 13.1             | 2.552e-27                            | 3                     | 0.902            | 3                     | 3.0            |
| HCH vs XLH  | WidthDist_PP1             | 170 / 87                       | 0.018 (0.002) / 0.016 (0.001) | 2.06 (1.51) / 0.113 (0.812)     | 1.608             | 13.5             | 3.241e-29                            | 2                     | 0.899            | 5                     | 3.5            |
| HCH vs SRS  | WidthDist_MC5             | 170 / 86                       | 0.02 (0.003) / 0.016 (0.002)  | 2.5 (1.64) / -0.548 (1.23)      | 2.098             | 16.7             | 5.23e-38                             | 1                     | 0.946            | 1                     | 1.0            |
| HCH vs SRS  | Bone_area_Handsi ze_ratio | 170 / 86                       | 0.037 (0.002) / 0.033 (0.002) | 2.39 (1.14) / 0.186 (1.02)      | 2.033             | 15.7             | 9.934e-34                            | 2                     | 0.934            | 3                     | 2.5            |
| HCH vs SRS  | Width_PP5                 | 170 / 86                       | 0.014 (0.003) / 0.011 (0.002) | 2.3 (1.53) / -0.54 (1.34)       | 1.963             | 15.2             | 1.254e-32                            | 3                     | 0.935            | 2                     | 2.5            |
| HCH vs MPS  | Length_PP2                | 170 / 85                       | 0.061 (0.002) / 0.065 (0.003) | -0.311 (1.14) / 1.94 (1.48)     | 1.698             | 12.3             | 4.055e-21                            | 1                     | 0.901            | 1                     | 1.0            |
| HCH vs MPS  | PP_MC_2_quotient          | 170 / 85                       | 0.609 (0.03) / 0.682 (0.052)  | 0.077 (1.04) / 2.35 (1.67)      | 1.626             | 11.5             | 1.901e-18                            | 2                     | 0.896            | 2                     | 2.0            |
| HCH vs MPS  | Length_MC5                | 170 / 85                       | 0.08 (0.003) / 0.074 (0.005)  | 0.973 (1.27) / -1.41 (1.86)     | 1.492             | 10.6             | 2.794e-17                            | 6                     | 0.865            | 3                     | 4.5            |
| HCH vs PHP  | Length_PM3                | 170 / 104                      | 0.042 (0.002) / 0.046 (0.003) | -0.427 (1.3) / 2.41 (1.96)      | 1.697             | 13.1             | 3.331e-24                            | 1                     | 0.903            | 2                     | 1.5            |
| HCH vs PHP  | Length_PP1                | 170 / 104                      | 0.046 (0.002) / 0.051 (0.004) | -0.227 (0.902) / 2.45 (1.98)    | 1.732             | 13.0             | 5.104e-23                            | 2                     | 0.922            | 1                     | 1.5            |

|            |                    |           |                               |                             |       |      |           |   |       |   |     |
|------------|--------------------|-----------|-------------------------------|-----------------------------|-------|------|-----------|---|-------|---|-----|
| HCH vs PHP | Length_PM4         | 170 / 104 | 0.04 (0.002) / 0.044 (0.003)  | -0.364 (1.26) / 2.07 (1.87) | 1.526 | 11.8 | 1.999e-21 | 3 | 0.86  | 6 | 4.5 |
| HCH vs ACH | Ratio_PP1_over_PPx | 170 / 189 | 0.764 (0.048) / 0.851 (0.058) | -0.029 (1.1) / 2.59 (1.58)  | 1.922 | 18.4 | 1.166e-50 | 3 | 0.932 | 3 | 3.0 |
| HCH vs ACH | WidthProx_MC2      | 170 / 189 | 0.026 (0.002) / 0.031 (0.003) | 1.71 (1.09) / 4.66 (1.81)   | 1.973 | 18.9 | 2.021e-51 | 2 | 0.931 | 4 | 3.0 |
| HCH vs ACH | WidthDist_PP4      | 170 / 189 | 0.019 (0.003) / 0.024 (0.003) | 2.91 (1.74) / 7.37 (2.84)   | 1.891 | 18.1 | 4.568e-49 | 5 | 0.936 | 1 | 3.0 |

### Supplementary Table 8.

#### Statistics of the highest-ranked features for differentiating between HCH and each other class.

The table lists the three highest-ranked features for each “HCH vs One” scenario. n denotes the number of images in the affected class to which the UA group is compared. The reported means and standard deviations represent the sex- and age-adjusted z-scores of the affected group relative to the UA training/reference set. The t-value and p-value are computed from the z-score distributions of the two groups. The absolute t-value was used to rank all 550 features within each scenario, yielding the t-test rank. The adjusted ROC AUC, defined as the maximum of ROC and (1 – ROC), calculated from the same z-scores, was used to generate a second ranking, the ROC-AUC rank. The sum of the t-test rank and the ROC-AUC rank provided the final combined score used to identify the top three features per scenario.

| Scenario    | Feature name                              | n (radiographs) Group1/ Group2 | Mean(SD) Group1/Group 2       | Mean(SD) Z-score Group1/Group 2 | Absolute Hedges' g | Absolute T-score | Benjamin i-Hochbe rg adjusted p-value | Rank Absolute T-score | ROC AUC Adjusted | Rank ROC AUC Adjusted | Combine d Rank |
|-------------|-------------------------------------------|--------------------------------|-------------------------------|---------------------------------|--------------------|------------------|---------------------------------------|-----------------------|------------------|-----------------------|----------------|
| SRS vs UA   | PM_MC_5_quotient                          | 86 / 1350                      | 0.272 (0.06) / 0.362 (0.035)  | -2.64 (1.81) / 0.01 (0.991)     | 1.809              | 13.4             | 1.486e-20                             | 2                     | 0.901            | 1                     | 1.5            |
| SRS vs UA   | PM_MC_2_quotient                          | 86 / 1350                      | 0.313 (0.024) / 0.347 (0.022) | -1.72 (1.16) / 0.001 (1.01)     | 1.585              | 13.4             | 8.325e-21                             | 1                     | 0.862            | 4                     | 2.5            |
| SRS vs UA   | Mean_Ulnar_Medial_Phal_Ratio_width/length | 86 / 1350                      | 0.424 (0.07) / 0.337 (0.06)   | 1.97 (1.48) / 0.003 (0.997)     | 1.563              | 12.2             | 1.676e-18                             | 3                     | 0.882            | 2                     | 2.5            |
| SRS vs SHOX | PM_MC_5_quotient                          | 86 / 317                       | 0.272 (0.06) / 0.358 (0.03)   | -2.64 (1.81) / -0.016 (0.875)   | 1.837              | 13.0             | 3.919e-20                             | 1                     | 0.904            | 1                     | 1.0            |
| SRS vs SHOX | Length_PM5                                | 86 / 317                       | 0.022 (0.005) / 0.028 (0.002) | -2.84 (2.19) / -0.013 (0.833)   | 1.701              | 11.7             | 7.267e-18                             | 2                     | 0.879            | 2                     | 2.0            |
| SRS vs SHOX | Ratio_PD_PM_over_PP_MC                    | 86 / 317                       | 0.385 (0.024) / 0.417 (0.019) | -1.71 (1.34) / 0.125 (1.08)     | 1.506              | 11.7             | 5.636e-19                             | 3                     | 0.862            | 3                     | 3.0            |
| SRS vs NS   | PM_MC_5_quotient                          | 86 / 134                       | 0.272 (0.06) / 0.346 (0.058)  | -2.64 (1.81) / -0.387 (1.84)    | 1.228              | 8.93             | 2.448e-13                             | 1                     | 0.83             | 1                     | 1.0            |
| SRS vs NS   | diaphyseal_tilt_MC5                       | 86 / 134                       | 0.973 (0.036) / 1.02 (0.035)  | -1.18 (1.18) / 0.198 (1.1)      | 1.206              | 8.69             | 7.414e-13                             | 2                     | 0.811            | 3                     | 2.5            |
| SRS vs NS   | Length_PM5                                | 86 / 134                       | 0.022 (0.005) / 0.027 (0.004) | -2.84 (2.19) / -0.466 (1.95)    | 1.139              | 8.17             | 6.742e-12                             | 6                     | 0.815            | 2                     | 4.0            |
| SRS vs TS   | Ratio_PD_PM_over_PP_MC                    | 86 / 111                       | 0.385 (0.024) / 0.425 (0.024) | -1.71 (1.34) / 0.832 (1.51)     | 1.777              | 12.5             | 6.905e-24                             | 1                     | 0.901            | 1                     | 1.0            |
| SRS vs TS   | Length_PM2                                | 86 / 111                       | 0.033 (0.002) / 0.036 (0.002) | -1.7 (1.35) / 0.706 (1.46)      | 1.710              | 12.0             | 8.675e-23                             | 3                     | 0.891            | 3                     | 3.0            |
| SRS vs TS   | PD_MC_5_quotient                          | 86 / 111                       | 0.288 (0.03) / 0.337 (0.031)  | -0.976 (1.33) / 1.37 (1.47)     | 1.663              | 11.7             | 4.95e-22                              | 4                     | 0.893            | 2                     | 3.0            |
| SRS vs XLH  | cti_mean_MC4                              | 86 / 87                        | 0.515 (0.117) / 0.372 (0.067) | 0.759 (1.51) / -2.02 (0.923)    | 2.208              | 14.6             | 1.358e-27                             | 1                     | 0.951            | 1                     | 1.0            |

|            |                                  |          |                               |                               |       |      |           |   |       |   |     |
|------------|----------------------------------|----------|-------------------------------|-------------------------------|-------|------|-----------|---|-------|---|-----|
| SRS vs XLH | Ratio_DistMaxWidth_MCWidth_MC4   | 86 / 87  | 1.72 (0.187) / 1.5 (0.166)    | 0.558 (0.917) / -1.3 (0.804)  | 2.15  | 14.2 | 4.207e-28 | 2 | 0.934 | 2 | 2.0 |
| SRS vs XLH | ProxmaxWidth_rel_al_l_widths_PP2 | 86 / 87  | 0.103 (0.01) / 0.095 (0.008)  | 0.224 (0.914) / -1.68 (0.847) | 2.147 | 14.2 | 4.207e-28 | 3 | 0.933 | 3 | 3.0 |
| SRS vs HCH | WidthDist_MC5                    | 86 / 170 | 0.016 (0.002) / 0.02 (0.003)  | -0.548 (1.23) / 2.5 (1.64)    | 2.098 | 16.7 | 5.23e-38  | 1 | 0.946 | 1 | 1.0 |
| SRS vs HCH | Bone_area_Handsize_ratio         | 86 / 170 | 0.033 (0.002) / 0.037 (0.002) | 0.186 (1.02) / 2.39 (1.14)    | 2.033 | 15.7 | 9.934e-34 | 2 | 0.934 | 3 | 2.5 |
| SRS vs HCH | Width_PP5                        | 86 / 170 | 0.011 (0.002) / 0.014 (0.003) | -0.54 (1.34) / 2.3 (1.53)     | 1.963 | 15.2 | 1.254e-32 | 3 | 0.935 | 2 | 2.5 |
| SRS vs MPS | PM_MC_2_quotient                 | 86 / 85  | 0.313 (0.024) / 0.389 (0.044) | -1.72 (1.16) / 1.97 (2.05)    | 2.205 | 14.5 | 1.351e-26 | 1 | 0.954 | 2 | 1.5 |
| SRS vs MPS | PM_MC_5_quotient                 | 86 / 85  | 0.272 (0.06) / 0.408 (0.066)  | -2.64 (1.81) / 1.36 (1.91)    | 2.134 | 14.0 | 2.589e-27 | 2 | 0.958 | 1 | 1.5 |
| SRS vs MPS | PP_MC_2_quotient                 | 86 / 85  | 0.602 (0.031) / 0.682 (0.052) | -0.44 (1.03) / 2.35 (1.67)    | 2     | 13.1 | 3.785e-24 | 5 | 0.938 | 3 | 4.0 |
| SRS vs PHP | PM_MC_5_quotient                 | 86 / 104 | 0.272 (0.06) / 0.416 (0.058)  | -2.64 (1.81) / 1.77 (1.89)    | 2.366 | 16.3 | 6.795e-35 | 1 | 0.972 | 1 | 1.0 |
| SRS vs PHP | Length_PM3                       | 86 / 104 | 0.041 (0.002) / 0.046 (0.003) | -1.11 (1.41) / 2.41 (1.96)    | 2.05  | 14.3 | 1.44e-29  | 3 | 0.939 | 3 | 3.0 |
| SRS vs PHP | PM_MC_4_quotient                 | 86 / 104 | 0.446 (0.039) / 0.598 (0.105) | -1.29 (1.17) / 3.93 (3.63)    | 1.926 | 13.8 | 4.422e-25 | 4 | 0.95  | 2 | 3.0 |
| SRS vs ACH | WidthProx_MC5                    | 86 / 189 | 0.019 (0.002) / 0.026 (0.003) | -0.137 (0.984) / 4.86 (2.15)  | 2.977 | 26.4 | 9.995e-75 | 2 | 0.994 | 1 | 1.5 |
| SRS vs ACH | Bone_area_Handsize_ratio         | 86 / 189 | 0.033 (0.002) / 0.043 (0.004) | 0.186 (1.02) / 5.45 (2.06)    | 3.22  | 28.2 | 5.606e-80 | 1 | 0.992 | 5 | 3.0 |
| SRS vs ACH | WidthDist_PM3                    | 86 / 189 | 0.015 (0.002) / 0.021 (0.003) | 1.05 (1.26) / 7.44 (2.8)      | 2.936 | 26.1 | 4.942e-74 | 4 | 0.992 | 4 | 4.0 |

**Supplementary Table 9.**

**Statistics of the highest-ranked features for differentiating between SRS and each other class.**

The table lists the three highest-ranked features for each “SRS vs One” scenario. n denotes the number of images in the affected class to which the UA group is compared. The reported means and standard deviations represent the sex- and age-adjusted z-scores of the affected group relative to the UA training/reference set. The t-value and p-value are computed from the z-score distributions of the two groups. The absolute t-value was used to rank all 550 features within each scenario, yielding the t-test rank. The adjusted ROC AUC, defined as the maximum of ROC and (1 – ROC), calculated from the same z-scores, was used to generate a second ranking, the ROC-AUC rank. The sum of the t-test rank and the ROC-AUC rank provided the final combined score used to identify the top three features per scenario.

| Scenario  | Feature name                   | n (radio graphs) Group1/Group2 | Mean(SD) Group1/Group2        | Mean(SD) Z-score Group1/Group2 | Absolute Hedges' g | Absolute T-score | Benjamin-Hochberg adjusted p-value | Rank Absolute T-score | ROC AUC Adjusted | Rank ROC AUC Adjusted | Combined Rank |
|-----------|--------------------------------|--------------------------------|-------------------------------|--------------------------------|--------------------|------------------|------------------------------------|-----------------------|------------------|-----------------------|---------------|
| MPS vs UA | Ratio_ProxMaxWidth_MCWidth_MC4 | 85 / 1350                      | 1.27 (0.295) / 1.81 (0.303)   | -1.77 (0.953) / -0.008 (0.997) | 1.803              | 16.5             | 5.858e-24                          | 1                     | 0.894            | 3                     | 2.0           |
| MPS vs UA | PP_MC_2_quotient               | 85 / 1350                      | 0.682 (0.052) / 0.609 (0.031) | 2.35 (1.67) / -0.003 (0.995)   | 1.709              | 12.8             | 3.775e-17                          | 5                     | 0.897            | 2                     | 3.5           |

|                    |                                     |           |                               |                               |       |      |           |   |       |   |     |
|--------------------|-------------------------------------|-----------|-------------------------------|-------------------------------|-------|------|-----------|---|-------|---|-----|
| <b>MPS vs UA</b>   | metacarpal_interossial_space_ratio  | 85 / 1350 | 0.59 (0.205) / 0.89 (0.125)   | -2.37 (1.62) / -0.011 (0.993) | 1.755 | 13.3 | 1.099e-17 | 4 | 0.885 | 6 | 5.0 |
| <b>MPS vs SHOX</b> | metacarpal_interossial_space_ratio  | 85 / 317  | 0.59 (0.205) / 0.922 (0.132)  | -2.37 (1.62) / 0.31 (1.01)    | 1.98  | 14.5 | 2.534e-21 | 1 | 0.914 | 1 | 1.0 |
| <b>MPS vs SHOX</b> | pointiness_proximal_MC4             | 85 / 317  | 0.968 (0.12) / 0.795 (0.068)  | 2.45 (1.78) / -0.377 (1.1)    | 1.907 | 13.9 | 3.193e-20 | 2 | 0.908 | 2 | 2.0 |
| <b>MPS vs SHOX</b> | proximal_rad_area/ellips_approx_MC4 | 85 / 317  | 1.38 (0.221) / 1.69 (0.172)   | -1.68 (1.19) / 0.277 (1.07)   | 1.728 | 13.8 | 2.534e-21 | 3 | 0.889 | 3 | 3.0 |
| <b>MPS vs NS</b>   | PP_MC_2_quotient                    | 85 / 134  | 0.682 (0.052) / 0.605 (0.036) | 2.35 (1.67) / -0.173 (1.19)   | 1.734 | 12.1 | 1.119e-17 | 1 | 0.897 | 1 | 1.0 |
| <b>MPS vs NS</b>   | metacarpal_interossial_space_ratio  | 85 / 134  | 0.59 (0.205) / 0.893 (0.139)  | -2.37 (1.62) / -0.001 (1.09)  | 1.712 | 11.9 | 3.414e-17 | 2 | 0.886 | 2 | 2.0 |
| <b>MPS vs NS</b>   | Length_MC2                          | 85 / 134  | 0.096 (0.005) / 0.102 (0.004) | -1.7 (1.59) / 0.54 (1.35)     | 1.512 | 10.8 | 2.535e-15 | 3 | 0.861 | 4 | 3.5 |
| <b>MPS vs TS</b>   | pointiness_proximal_MC4             | 85 / 111  | 0.968 (0.12) / 0.779 (0.056)  | 2.45 (1.78) / -0.326 (0.964)  | 1.933 | 13.0 | 1.37e-19  | 1 | 0.907 | 2 | 1.5 |
| <b>MPS vs TS</b>   | Length_PP4                          | 85 / 111  | 0.067 (0.003) / 0.062 (0.002) | 1.37 (1.51) / -0.957 (1.04)   | 1.784 | 12.1 | 7.316e-19 | 6 | 0.909 | 1 | 3.5 |
| <b>MPS vs TS</b>   | proximal_rad_area/ellips_approx_MC4 | 85 / 111  | 1.38 (0.221) / 1.77 (0.168)   | -1.68 (1.19) / 0.481 (1.17)   | 1.822 | 12.7 | 5.52e-21  | 2 | 0.899 | 5 | 3.5 |
| <b>MPS vs XLH</b>  | PP_MC_2_quotient                    | 85 / 87   | 0.682 (0.052) / 0.596 (0.026) | 2.35 (1.67) / -0.393 (1.02)   | 1.97  | 12.9 | 7.201e-20 | 1 | 0.933 | 1 | 1.0 |
| <b>MPS vs XLH</b>  | Length_PP2                          | 85 / 87   | 0.065 (0.003) / 0.06 (0.002)  | 1.94 (1.48) / -0.418 (1.09)   | 1.807 | 11.9 | 4.36e-18  | 3 | 0.897 | 3 | 3.0 |
| <b>MPS vs XLH</b>  | Length_PP5                          | 85 / 87   | 0.053 (0.003) / 0.049 (0.002) | 1.66 (1.65) / -0.705 (0.986)  | 1.732 | 11.4 | 2.269e-16 | 4 | 0.895 | 5 | 4.5 |
| <b>MPS vs HCH</b>  | Length_PP2                          | 85 / 170  | 0.065 (0.003) / 0.061 (0.002) | 1.94 (1.48) / -0.311 (1.14)   | 1.698 | 12.3 | 4.055e-18 | 1 | 0.901 | 1 | 1.0 |
| <b>MPS vs HCH</b>  | PP_MC_2_quotient                    | 85 / 170  | 0.682 (0.052) / 0.609 (0.03)  | 2.35 (1.67) / 0.077 (1.04)    | 1.626 | 11.5 | 1.901e-15 | 2 | 0.896 | 2 | 2.0 |
| <b>MPS vs HCH</b>  | Length_MC5                          | 85 / 170  | 0.074 (0.005) / 0.08 (0.003)  | -1.41 (1.86) / 0.973 (1.27)   | 1.492 | 10.6 | 2.794e-14 | 6 | 0.865 | 3 | 4.5 |
| <b>MPS vs SRS</b>  | PM_MC_2_quotient                    | 85 / 86   | 0.389 (0.044) / 0.313 (0.024) | 1.97 (2.05) / -1.72 (1.16)    | 2.205 | 14.5 | 1.351e-23 | 1 | 0.954 | 2 | 1.5 |
| <b>MPS vs SRS</b>  | PM_MC_5_quotient                    | 85 / 86   | 0.408 (0.066) / 0.272 (0.06)  | 1.36 (1.91) / -2.64 (1.81)    | 2.134 | 14.0 | 2.589e-24 | 2 | 0.958 | 1 | 1.5 |
| <b>MPS vs SRS</b>  | PP_MC_2_quotient                    | 85 / 86   | 0.682 (0.052) / 0.602 (0.031) | 2.35 (1.67) / -0.44 (1.03)    | 2.000 | 13.1 | 3.785e-21 | 5 | 0.938 | 3 | 4.0 |
| <b>MPS vs PHP</b>  | PD1_quotient                        | 85 / 104  | 0.316 (0.034) / 0.265 (0.047) | 0.518 (1.48) / -2.2 (1.99)    | 1.546 | 10.8 | 1.405e-15 | 1 | 0.856 | 1 | 1.0 |
| <b>MPS vs PHP</b>  | rel2b_prox_epiphyseal_length_MC2    | 85 / 104  | 0.181 (0.074) / 0.089 (0.043) | 2.83 (2.21) / 0.06 (1.24)     | 1.534 | 10.3 | 4.39e-13  | 2 | 0.852 | 2 | 2.0 |
| <b>MPS vs PHP</b>  | Length_PD1                          | 85 / 104  | 0.035 (0.003) / 0.031 (0.004) | 0.335 (1.56) / -2.49 (2.23)   | 1.466 | 10.2 | 2.606e-14 | 3 | 0.841 | 5 | 4.0 |

|                   |            |          |                               |                            |       |      |           |   |       |   |     |
|-------------------|------------|----------|-------------------------------|----------------------------|-------|------|-----------|---|-------|---|-----|
| <b>MPS vs ACH</b> | Length_PP2 | 85 / 189 | 0.065 (0.003) / 0.057 (0.002) | 1.94 (1.48) / -2.46 (1.5)  | 2.941 | 22.7 | 3.108e-47 | 2 | 0.989 | 1 | 1.5 |
| <b>MPS vs ACH</b> | Length_PP4 | 85 / 189 | 0.067 (0.003) / 0.059 (0.002) | 1.37 (1.51) / -2.88 (1.35) | 3.052 | 22.2 | 7.959e-44 | 3 | 0.988 | 2 | 2.5 |
| <b>MPS vs ACH</b> | Length_PP3 | 85 / 189 | 0.071 (0.003) / 0.062 (0.003) | 1.07 (1.41) / -3.58 (1.62) | 2.954 | 24.1 | 6.202e-53 | 1 | 0.986 | 3 | 2.0 |

**Supplementary Table 10.**

**Statistics of the highest-ranked features for differentiating between MPS and each affected class.**

The table lists the three highest-ranked features for each “MPS vs One” scenario. n denotes the number of images in the affected class to which the UA group is compared. The reported means and standard deviations represent the sex- and age-adjusted z-scores of the affected group relative to the UA training/reference set. The t-value and p-value are computed from the z-score distributions of the two groups. The absolute t-value was used to rank all 550 features within each scenario, yielding the t-test rank. The adjusted ROC AUC, defined as the maximum of ROC and (1 – ROC), calculated from the same z-scores, was used to generate a second ranking, the ROC-AUC rank. The sum of the t-test rank and the ROC-AUC rank provided the final combined score used to identify the top three features per scenario.

| Scenario    | Feature name                       | n (radiographs) Group1/ Group2 | Mean(SD) Group1/Group 2       | Mean(SD) Z-score Group1/Group 2 | Absolute Hedge s' g | Absolute T-score | Benjamini-Hochberg adjusted p-value | Rank Absolute T-score | ROC AUC Adjusted | Rank ROC AUC Adjusted | Combined Rank |
|-------------|------------------------------------|--------------------------------|-------------------------------|---------------------------------|---------------------|------------------|-------------------------------------|-----------------------|------------------|-----------------------|---------------|
| PHP vs UA   | Bone_area_Handsize_ratio           | 104 / 1350                     | 0.044 (0.008) / 0.033 (0.002) | 5.67 (4.26) / 0.0 (0.992)       | 1.832               | 13.5             | 6.064e-22                           | 1                     | 0.89             | 1                     | 1.0           |
| PHP vs UA   | WidthProx_MC5                      | 104 / 1350                     | 0.024 (0.004) / 0.019 (0.002) | 3.45 (2.67) / -0.002 (0.999)    | 1.713               | 13.1             | 1.834e-21                           | 2                     | 0.869            | 4                     | 3.0           |
| PHP vs UA   | Length_PP1                         | 104 / 1350                     | 0.051 (0.004) / 0.047 (0.002) | 2.45 (1.98) / 0.003 (0.996)     | 1.557               | 12.5             | 1.378e-20                           | 6                     | 0.881            | 2                     | 4.0           |
| PHP vs SHOX | Length_PP1                         | 104 / 317                      | 0.051 (0.004) / 0.046 (0.002) | 2.45 (1.98) / -0.033 (0.886)    | 1.613               | 12.4             | 6.398e-21                           | 3                     | 0.902            | 1                     | 2.0           |
| PHP vs SHOX | Length_PD1                         | 104 / 317                      | 0.031 (0.004) / 0.035 (0.002) | -2.49 (2.23) / 0.474 (1.04)     | 1.707               | 13.1             | 2.087e-22                           | 2                     | 0.868            | 3                     | 2.5           |
| PHP vs SHOX | metacarpal_interossial_space_ratio | 104 / 317                      | 0.7 (0.167) / 0.922 (0.132)   | -1.48 (1.25) / 0.31 (1.01)      | 1.565               | 13.2             | 4.21e-24                            | 1                     | 0.862            | 5                     | 3.0           |
| PHP vs NS   | Length_PM3                         | 104 / 134                      | 0.046 (0.003) / 0.041 (0.002) | 2.41 (1.96) / -0.774 (1.43)     | 1.844               | 13.9             | 1.311e-27                           | 1                     | 0.921            | 1                     | 1.0           |
| PHP vs NS   | Length_PD1                         | 104 / 134                      | 0.031 (0.004) / 0.035 (0.002) | -2.49 (2.23) / 0.625 (1.13)     | 1.762               | 13.0             | 9.962e-24                           | 2                     | 0.876            | 3                     | 2.5           |
| PHP vs NS   | Bone_area_Handsize_ratio           | 104 / 134                      | 0.044 (0.008) / 0.034 (0.002) | 5.67 (4.26) / 0.776 (0.945)     | 1.581               | 11.5             | 1.307e-18                           | 3                     | 0.872            | 4                     | 3.5           |
| PHP vs TS   | DistmaxWidth_rel_all_widths_PD4    | 104 / 111                      | 0.042 (0.006) / 0.052 (0.007) | -0.813 (1.26) / 1.39 (1.53)     | 1.57                | 11.6             | 7.277e-22                           | 2                     | 0.882            | 1                     | 1.5           |
| PHP vs TS   | Length_PD1                         | 104 / 111                      | 0.031 (0.004) / 0.035 (0.002) | -2.49 (2.23) / 0.582 (1.2)      | 1.713               | 12.5             | 1.614e-22                           | 1                     | 0.872            | 3                     | 2.0           |
| PHP vs TS   | Bone_area_Handsize_ratio           | 104 / 111                      | 0.044 (0.008) / 0.034 (0.002) | 5.67 (4.26) / 1.03 (0.901)      | 1.502               | 10.9             | 1.841e-17                           | 4                     | 0.861            | 5                     | 4.5           |
| PHP vs XLH  | Length_PP1                         | 104 / 87                       | 0.051 (0.004) / 0.046 (0.002) | 2.45 (1.98) / -0.418 (0.75)     | 1.904               | 13.6             | 1.337e-24                           | 1                     | 0.953            | 1                     | 1.0           |

|            |                                  |           |                               |                              |       |      |           |   |       |   |     |
|------------|----------------------------------|-----------|-------------------------------|------------------------------|-------|------|-----------|---|-------|---|-----|
| PHP vs XLH | PP_MC_5_quotient                 | 104 / 87  | 0.754 (0.106) / 0.614 (0.032) | 4.01 (3.92) / -0.88 (1.01)   | 1.705 | 12.3 | 8.025e-21 | 3 | 0.921 | 2 | 2.5 |
| PHP vs XLH | Ratio_DistMaxWidth_MCWidth_MC2   | 104 / 87  | 1.76 (0.213) / 1.48 (0.115)   | 0.369 (1.15) / -1.57 (0.973) | 1.821 | 12.7 | 1.337e-24 | 2 | 0.92  | 3 | 2.5 |
| PHP vs HCH | Length_PM3                       | 104 / 170 | 0.046 (0.003) / 0.042 (0.002) | 2.41 (1.96) / -0.427 (1.3)   | 1.697 | 13.1 | 3.331e-24 | 1 | 0.903 | 2 | 1.5 |
| PHP vs HCH | Length_PP1                       | 104 / 170 | 0.051 (0.004) / 0.046 (0.002) | 2.45 (1.98) / -0.227 (0.902) | 1.732 | 13.0 | 5.104e-23 | 2 | 0.922 | 1 | 1.5 |
| PHP vs HCH | Length_PM4                       | 104 / 170 | 0.044 (0.003) / 0.04 (0.002)  | 2.07 (1.87) / -0.364 (1.26)  | 1.526 | 11.8 | 1.999e-21 | 3 | 0.86  | 6 | 4.5 |
| PHP vs SRS | PM_MC_5_quotient                 | 104 / 86  | 0.416 (0.058) / 0.272 (0.06)  | 1.77 (1.89) / -2.64 (1.81)   | 2.366 | 16.3 | 6.795e-35 | 1 | 0.972 | 1 | 1.0 |
| PHP vs SRS | Length_PM3                       | 104 / 86  | 0.046 (0.003) / 0.041 (0.002) | 2.41 (1.96) / -1.11 (1.41)   | 2.05  | 14.3 | 1.44e-29  | 3 | 0.939 | 3 | 3.0 |
| PHP vs SRS | PM_MC_4_quotient                 | 104 / 86  | 0.598 (0.105) / 0.446 (0.039) | 3.93 (3.63) / -1.29 (1.17)   | 1.926 | 13.8 | 4.422e-25 | 4 | 0.95  | 2 | 3.0 |
| PHP vs MPS | PD1_quotient                     | 104 / 85  | 0.265 (0.047) / 0.316 (0.034) | -2.2 (1.99) / 0.518 (1.48)   | 1.546 | 10.8 | 1.405e-18 | 1 | 0.856 | 1 | 1.0 |
| PHP vs MPS | rel2b_prox_epiphyseal_length_MC2 | 104 / 85  | 0.089 (0.043) / 0.181 (0.074) | 0.06 (1.24) / 2.83 (2.21)    | 1.534 | 10.3 | 4.39e-16  | 2 | 0.852 | 2 | 2.0 |
| PHP vs MPS | Length_PD1                       | 104 / 85  | 0.031 (0.004) / 0.035 (0.003) | -2.49 (2.23) / 0.335 (1.56)  | 1.466 | 10.2 | 2.606e-17 | 3 | 0.841 | 5 | 4.0 |
| PHP vs ACH | WidthMin_PM3                     | 104 / 189 | 0.054 (0.003) / 0.063 (0.004) | -0.674 (1.34) / 3.09 (1.48)  | 2.656 | 22.1 | 1.231e-56 | 1 | 0.972 | 2 | 1.5 |
| PHP vs ACH | MinWidth_rel_all_widths_PM3      | 104 / 189 | 0.054 (0.003) / 0.063 (0.004) | -0.674 (1.34) / 3.09 (1.48)  | 2.656 | 22.1 | 1.231e-56 | 1 | 0.972 | 2 | 1.5 |
| PHP vs ACH | Length_PP3                       | 104 / 189 | 0.072 (0.005) / 0.062 (0.003) | 2.32 (2.76) / -3.58 (1.62)   | 2.596 | 20.0 | 2.39e-41  | 3 | 0.986 | 1 | 2.0 |

**Supplementary Table 11.**

**Statistics of the highest-ranked features for differentiating between PHP and each affected class.**

The table lists the three highest-ranked features for each “UA vs One” scenario. n denotes the number of images in the affected class to which the UA group is compared. The reported means and standard deviations represent the sex- and age-adjusted z-scores of the affected group relative to the UA training/reference set. The t-value and p-value are computed from the z-score distributions of the two groups. The absolute t-value was used to rank all 550 features within each scenario, yielding the t-test rank. The adjusted ROC AUC, defined as the maximum of ROC and (1 – ROC), calculated from the same z-scores, was used to generate a second ranking, the ROC-AUC rank. The sum of the t-test rank and the ROC-AUC rank provided the final combined score used to identify the top three features per scenario.

| Scenario  | Feature name  | n (radiographs) Group1/Group2 | Mean(SD) Group1/Group2        | Mean(SD) Z-score Group1/Group2 | Absolute Hedges' g | Absolute T-score | Benjamini-Hochberg adjusted p-value | Rank Absolute T-score | ROC AUC Adjusted | Rank ROC AUC Adjusted | Combined Rank |
|-----------|---------------|-------------------------------|-------------------------------|--------------------------------|--------------------|------------------|-------------------------------------|-----------------------|------------------|-----------------------|---------------|
| ACH vs UA | WidthDist_PM3 | 189 / 1350                    | 0.021 (0.003) / 0.014 (0.002) | 7.44 (2.8) / 0.008 (0.994)     | 3.535              | 36.2             | 2.238e-83                           | 2                     | 0.999            | 3                     | 2.5           |
| ACH vs UA | WidthDist_PM2 | 189 / 1350                    | 0.019 (0.003) / 0.013 (0.001) | 7.11 (2.64) / 0.003 (0.998)    | 3.46               | 36.7             | 1.777e-84                           | 1                     | 0.998            | 5                     | 3.0           |
| ACH vs UA | WidthDist_PP4 | 189 / 1350                    | 0.024 (0.003) / 0.016 (0.002) | 7.37 (2.84) / 0.004 (0.998)    | 3.563              | 35.4             | 8.11e-82                            | 5                     | 0.999            | 1                     | 3.0           |

|                    |                             |           |                               |                              |       |      |           |   |       |   |     |
|--------------------|-----------------------------|-----------|-------------------------------|------------------------------|-------|------|-----------|---|-------|---|-----|
| <b>ACH vs SHOX</b> | WidthDist_PP4               | 189 / 317 | 0.024 (0.003) / 0.017 (0.002) | 7.37 (2.84) / 0.584 (0.923)  | 3.211 | 31.9 | 0.998     | 1 | 0.998 | 1 | 1.0 |
| <b>ACH vs SHOX</b> | WidthDist_PM3               | 189 / 317 | 0.021 (0.003) / 0.015 (0.001) | 7.44 (2.8) / 0.803 (0.807)   | 3.216 | 31.8 | 0.997     | 2 | 0.997 | 3 | 2.5 |
| <b>ACH vs SHOX</b> | WidthDist_PM2               | 189 / 317 | 0.019 (0.003) / 0.014 (0.001) | 7.11 (2.64) / 0.898 (0.901)  | 3.147 | 31.3 | 0.993     | 3 | 0.993 | 5 | 4.0 |
| <b>ACH vs NS</b>   | WidthDist_PM3               | 189 / 134 | 0.021 (0.003) / 0.015 (0.001) | 7.44 (2.8) / 0.713 (0.992)   | 3.195 | 30.4 | 3.251e-80 | 1 | 0.996 | 2 | 1.5 |
| <b>ACH vs NS</b>   | WidthDist_PP4               | 189 / 134 | 0.024 (0.003) / 0.017 (0.002) | 7.37 (2.84) / 1.18 (1.08)    | 2.875 | 27.3 | 4.25e-73  | 4 | 0.996 | 1 | 2.5 |
| <b>ACH vs NS</b>   | WidthDist_PM2               | 189 / 134 | 0.019 (0.003) / 0.014 (0.001) | 7.11 (2.64) / 1.23 (1.04)    | 2.924 | 27.7 | 7.279e-75 | 2 | 0.987 | 5 | 3.5 |
| <b>ACH vs TS</b>   | WidthDist_PP4               | 189 / 111 | 0.024 (0.003) / 0.016 (0.001) | 7.37 (2.84) / 0.394 (0.995)  | 3.271 | 30.7 | 4.551e-82 | 1 | 0.999 | 1 | 1.0 |
| <b>ACH vs TS</b>   | WidthDist_PP3               | 189 / 111 | 0.025 (0.004) / 0.017 (0.001) | 7.18 (3.04) / 0.456 (0.841)  | 3.011 | 28.6 | 3.236e-73 | 2 | 0.998 | 2 | 2.0 |
| <b>ACH vs TS</b>   | WidthDist_PM2               | 189 / 111 | 0.019 (0.003) / 0.014 (0.001) | 7.11 (2.64) / 1.07 (1.06)    | 2.996 | 27.9 | 2.839e-76 | 3 | 0.99  | 4 | 3.5 |
| <b>ACH vs XLH</b>  | WidthProx_MC2               | 189 / 87  | 0.031 (0.003) / 0.023 (0.002) | 4.66 (1.81) / -0.269 (0.988) | 3.372 | 29.2 | 3.637e-79 | 1 | 0.995 | 1 | 1.0 |
| <b>ACH vs XLH</b>  | WidthDist_PM3               | 189 / 87  | 0.021 (0.003) / 0.014 (0.002) | 7.44 (2.8) / 0.521 (1.25)    | 3.181 | 28.4 | 5.178e-78 | 2 | 0.993 | 4 | 3.0 |
| <b>ACH vs XLH</b>  | WidthDist_PP4               | 189 / 87  | 0.024 (0.003) / 0.016 (0.002) | 7.37 (2.84) / 0.743 (1.27)   | 3.007 | 26.8 | 2.04e-73  | 4 | 0.994 | 3 | 3.5 |
| <b>ACH vs HCH</b>  | Ratio_PP1_over_PPx          | 189 / 170 | 0.851 (0.058) / 0.764 (0.048) | 2.59 (1.58) / -0.029 (1.1)   | 1.922 | 18.4 | 1.166e-47 | 3 | 0.932 | 3 | 3.0 |
| <b>ACH vs HCH</b>  | WidthProx_MC2               | 189 / 170 | 0.031 (0.003) / 0.026 (0.002) | 4.66 (1.81) / 1.71 (1.09)    | 1.973 | 18.9 | 2.021e-48 | 2 | 0.931 | 4 | 3.0 |
| <b>ACH vs HCH</b>  | WidthDist_PP4               | 189 / 170 | 0.024 (0.003) / 0.019 (0.003) | 7.37 (2.84) / 2.91 (1.74)    | 1.891 | 18.1 | 4.568e-46 | 5 | 0.936 | 1 | 3.0 |
| <b>ACH vs SRS</b>  | WidthProx_MC5               | 189 / 86  | 0.026 (0.003) / 0.019 (0.002) | 4.86 (2.15) / -0.137 (0.984) | 2.977 | 26.4 | 9.995e-72 | 2 | 0.994 | 1 | 1.5 |
| <b>ACH vs SRS</b>  | Bone_area_Handsize_ratio    | 189 / 86  | 0.043 (0.004) / 0.033 (0.002) | 5.45 (2.06) / 0.186 (1.02)   | 3.22  | 28.2 | 5.606e-77 | 1 | 0.992 | 5 | 3.0 |
| <b>ACH vs SRS</b>  | WidthDist_PM3               | 189 / 86  | 0.021 (0.003) / 0.015 (0.002) | 7.44 (2.8) / 1.05 (1.26)     | 2.936 | 26.1 | 4.942e-71 | 4 | 0.992 | 4 | 4.0 |
| <b>ACH vs MPS</b>  | Length_PP2                  | 189 / 85  | 0.057 (0.002) / 0.065 (0.003) | -2.46 (1.5) / 1.94 (1.48)    | 2.941 | 22.7 | 3.108e-47 | 2 | 0.989 | 1 | 1.5 |
| <b>ACH vs MPS</b>  | Length_PP3                  | 189 / 85  | 0.062 (0.003) / 0.071 (0.003) | -3.58 (1.62) / 1.07 (1.41)   | 3.052 | 24.1 | 6.202e-53 | 1 | 0.986 | 3 | 2.0 |
| <b>ACH vs MPS</b>  | Length_PP4                  | 189 / 85  | 0.059 (0.002) / 0.067 (0.003) | -2.88 (1.35) / 1.37 (1.51)   | 2.954 | 22.2 | 7.959e-44 | 3 | 0.988 | 2 | 2.5 |
| <b>ACH vs PHP</b>  | WidthMin_PM3                | 189 / 104 | 0.063 (0.004) / 0.054 (0.003) | 3.09 (1.48) / -0.674 (1.34)  | 2.656 | 22.1 | 1.231e-53 | 1 | 0.972 | 2 | 1.5 |
| <b>ACH vs PHP</b>  | MinWidth_rel_all_widths_PM3 | 189 / 104 | 0.063 (0.004) / 0.054 (0.003) | 3.09 (1.48) / -0.674 (1.34)  | 2.656 | 22.1 | 1.231e-53 | 1 | 0.972 | 2 | 1.5 |
| <b>ACH vs PHP</b>  | Length_PP3                  | 189 / 104 | 0.062 (0.003) / 0.072 (0.005) | -3.58 (1.62) / 2.32 (2.76)   | 2.596 | 20.0 | 2.39e-38  | 3 | 0.986 | 1 | 2.0 |

**Supplementary Table 12.**

**Statistics of the highest-ranked features for differentiating between ACH and each other class.**

The table lists the three highest-ranked features for each “ACH vs One” scenario. n denotes the number of images in the affected class to which the UA group is compared. The reported means and standard deviations represent the sex- and age-adjusted z-scores of the affected group relative to the UA training/reference set. The t-value and p-value are computed from

the z-score distributions of the two groups. The absolute t-value was used to rank all 550 features within each scenario, yielding the t-test rank. The adjusted ROC AUC, defined as the maximum of ROC and (1 – ROC), calculated from the same z-scores, was used to generate a second ranking, the ROC-AUC rank. The sum of the t-test rank and the ROC-AUC rank provided the final combined score used to identify the top three features per scenario.

| Acquisition source institution                                | N hand radiographs | N patients |
|---------------------------------------------------------------|--------------------|------------|
| Children's Hospital of Los Angeles, Los Angeles, USA          | 1277               | 1277       |
| University Hospital Magdeburg, Magdeburg, Germany             | 659                | 302        |
| Kinderzentrum Am Johannisplatz, Leipzig, Germany              | 416                | 75         |
| BioMarin                                                      | 145                | 43         |
| Hospital Universitario La Paz, Madrid, Spain                  | 60                 | 25         |
| Publications                                                  | 47                 | 40         |
| University Medical Center Hamburg-Eppendorf, Hamburg, Germany | 25                 | 18         |
| University Hospital of Giessen, Giessen, Germany              | 13                 | 7          |
| University of Pavia, Pavia, Italy                             | 12                 | 3          |
| Total:                                                        | 2654               | 1790       |

**Supplementary Table 13:** Sources or acquisitions institutions of all radiographs and data used in this study in declining order. Patients who were represented in more than one institution are counted multiple times in this table. Note that one patient appeared in two source institutions; therefore, the total number of patients in this table is one higher than in Table 14.

| Cohort or Conditions | N radiographs in training set | N unique patients in trainings set | N radiographs in test set | N unique patients in test set | N radiographs total | N unique patients total |
|----------------------|-------------------------------|------------------------------------|---------------------------|-------------------------------|---------------------|-------------------------|
| UA                   | 1303                          | 1303                               | 50                        | 50                            | 1353                | 1353                    |
| ACH                  | 174                           | 64                                 | 15                        | 6                             | 189                 | 70                      |
| HCH                  | 155                           | 48                                 | 15                        | 5                             | 170                 | 53                      |
| MPS type 1*          | 28                            | 21                                 | 3                         | 3                             | 31                  | 24                      |
| MPS type 2*          | 17                            | 10                                 | 2                         | 2                             | 19                  | 12                      |
| MPS type 4*          | 21                            | 12                                 | 4                         | 3                             | 25                  | 15                      |
| MPS type 6*          | 9                             | 9                                  | 1                         | 1                             | 10                  | 10                      |
| PHP                  | 89                            | 34                                 | 15                        | 8                             | 104                 | 42                      |
| NS                   | 119                           | 31                                 | 15                        | 7                             | 134                 | 38                      |
| SHOX                 | 302                           | 59                                 | 15                        | 4                             | 317                 | 63                      |
| SRS                  | 76                            | 16                                 | 10                        | 5                             | 86                  | 21                      |



|                                        |           |           |          |           |            |           |           |
|----------------------------------------|-----------|-----------|----------|-----------|------------|-----------|-----------|
| <b>KBG syndrome</b>                    | 0 (0.0%)  | 1 (50.0%) | 0 (0.0%) | 1 (50.0%) | 0 (0.0%)   | 0 (0.0%)  | 0 (0.0%)  |
| <b>Léri-Weill dyschondrosteosis</b>    | 0 (0.0%)  | 0 (0.0%)  | 0 (0.0%) | 0 (0.0%)  | 2 (100.0%) | 0 (0.0%)  | 0 (0.0%)  |
| <b>Maffucci syndrome</b>               | 1 (50.0%) | 0 (0.0%)  | 0 (0.0%) | 0 (0.0%)  | 0 (0.0%)   | 1 (50.0%) | 0 (0.0%)  |
| <b>Osteogenesis imperfecta, type I</b> | 1 (50.0%) | 0 (0.0%)  | 0 (0.0%) | 0 (0.0%)  | 0 (0.0%)   | 1 (50.0%) | 0 (0.0%)  |
| <b>Pseudoachondroplasia</b>            | 1 (50.0%) | 0 (0.0%)  | 0 (0.0%) | 0 (0.0%)  | 0 (0.0%)   | 1 (50.0%) | 0 (0.0%)  |
| <b>Total additional conditions:</b>    | 4 (22.2%) | 2 (11.1%) | 1 (5.6%) | 2 (11.1%) | 3 (16.7%)  | 4 (22.2%) | 2 (11.1%) |

\* If no chronological age at image acquisition was available, automatically derived bone age was used as default.

\*\* The conditions MPS type I, II, IV and VI were merged into one cohort MPS in our study

### Supplementary Table 15. Age distribution of hand radiographs across cohorts.

Number and percentage of radiographs per age group (0–3 to ≥18 years and age unknown) for each cohort and condition. Percentages are given relative to the total number of radiographs within each cohort. Mucopolysaccharidosis (MPS) types I, II, IV, and VI were combined into a single MPS cohort for all analyses. In cases where the chronological age was not available at the time of the study we use the automated bone age derived from Deepiasia as default, but only for this table. This was the case for 7.7%, 205 of 2654 radiographs.

| chronological age group | Number of radiographs per age group in training set | Relative portion in training set | Number of radiographs per age group in test set | Relative portion in test set |
|-------------------------|-----------------------------------------------------|----------------------------------|-------------------------------------------------|------------------------------|
| <b>0-3</b>              | 114                                                 | 0.046                            | 13                                              | 0.076                        |
| <b>3-6</b>              | 292                                                 | 0.118                            | 20                                              | 0.118                        |
| <b>6-9</b>              | 479                                                 | 0.194                            | 25                                              | 0.147                        |
| <b>9-12</b>             | 562                                                 | 0.228                            | 34                                              | 0.2                          |
| <b>12-15</b>            | 510                                                 | 0.207                            | 34                                              | 0.2                          |
| <b>15-18</b>            | 254                                                 | 0.103                            | 18                                              | 0.106                        |
| <b>18+</b>              | 75                                                  | 0.03                             | 7                                               | 0.041                        |
| <b>Age unknown</b>      | 180                                                 | 0.073                            | 19                                              | 0.112                        |

### Supplementary Table 16. Age distribution of hand radiographs in the training and test sets.

Absolute numbers and relative proportions of radiographs per age group in the training and test sets (UA, SHOX, NS, TS, HCH, ACH, MPS, XLH, PHP, SRS). Relative portions are given as fractions of the respective dataset totals. Age groups are defined as for creation of the z-scores in 3-year intervals, with an additional category for unknown age. Note that in this table
